# Supplementary material for: The Prevalence of TET2 Gene Mutations in Patients with BCR-ABL-Negative Myeloproliferative Neoplasms (MPN): A Systematic Review and Meta-Analysis
Source: MDPI journal article supplement (doi:10.3390/cancers13123078), 2021-06-20
Supplement: s1 [file s1]

# Supplementary materials

**Table S1.** Search strategies.

| Databases      | Search strategies                                                                                                                                                                                                                                         |
|----------------|-----------------------------------------------------------------------------------------------------------------------------------------------------------------------------------------------------------------------------------------------------------|
| PubMed         | (Ten-Eleven Translocation 2[Title/Abstract] OR TET2[Title/Abstract]) AND (myeloproliferative[Title/Abstract] OR vera[Title/Abstract] OR thrombocythemia[Title/Abstract] OR thrombocytosis[Title/Abstract] OR myelofibrosis[Title/Abstract])               |
| ScienceDirect  | ("Ten-Eleven Translocation 2" OR TET2) AND (myeloproliferative OR vera OR thrombocythemia OR thrombocytosis OR myelofibrosis)                                                                                                                             |
| Embase         | ("Ten-Eleven Translocation 2':ti OR TET2:ti) AND (myeloproliferative:ti OR vera:ti OR thrombocythemia:ti OR thrombocytosis:ti OR myelofibrosis:ti)                                                                                                        |
| Scopus         | TITLE-ABS("Ten-Eleven Translocation 2" OR TET2) AND TITLE-ABS(myeloproliferative OR vera OR thrombocythemia OR thrombocytosis OR myelofibrosis)                                                                                                           |
| Web of Science | TI=("Ten-Eleven Translocation 2" OR TET2) AND TI=(myeloproliferative OR vera OR thrombocythemia OR thrombocytosis OR myelofibrosis)                                                                                                                       |
| Google Scholar | allintitle: myeloproliferative TET2<br>allintitle: myeloproliferative Ten-Eleven Translocation 2<br>allintitle: MPN TET2<br>allintitle: vera TET2<br>allintitle: thrombocythemia TET2<br>allintitle: thrombocytosis TET2<br>allintitle:myelofibrosis TET2 |

**Table S2.** Quality assessment of the included cross-sectional studies.

| No. | Study ID                  | Questions assessing included cross-sectional studies |   |   |   |   |   |   |   | Yes (%) |
|-----|---------------------------|------------------------------------------------------|---|---|---|---|---|---|---|---------|
|     |                           | 1                                                    | 2 | 3 | 4 | 5 | 6 | 7 | 8 |         |
| 1   | Andreasson 2020 [1]       | Y                                                    | Y | Y | Y | Y | Y | Y | Y | 100.0   |
| 2   | Barraco 2017 [2]          | Y                                                    | Y | N | Y | Y | Y | N | Y | 75.0    |
| 3   | Brecqueville 2012 [3]     | Y                                                    | Y | Y | Y | Y | Y | Y | Y | 100.0   |
| 4   | Brecqueville 2014 [4]     | Y                                                    | Y | Y | Y | Y | Y | Y | Y | 100.0   |
| 5   | Carbuccia 2009 [5]        | N                                                    | N | Y | Y | N | N | Y | N | 37.5    |
| 6   | Cerquozzi 2017 [6]        | Y                                                    | Y | Y | Y | Y | Y | Y | Y | 100.0   |
| 7   | Delhommeau 2009 [7]       | Y                                                    | Y | Y | Y | N | N | Y | N | 62.5    |
| 8   | Delic 2016 [8]            | Y                                                    | Y | Y | Y | Y | Y | Y | Y | 100.0   |
| 9   | Gill 2018 [9]             | Y                                                    | Y | Y | Y | Y | Y | Y | Y | 100.0   |
| 10  | Guglielmelli 2011 [10]    | Y                                                    | Y | N | Y | Y | Y | Y | Y | 87.5    |
| 11  | Ha 2014 [11]              | Y                                                    | Y | Y | Y | Y | Y | Y | Y | 100.0   |
| 12  | Huang 2020 [12]           | Y                                                    | Y | Y | Y | Y | Y | Y | Y | 100.0   |
| 13  | Hussein 2010 [13]         | Y                                                    | N | Y | Y | Y | N | Y | N | 62.5    |
| 14  | Kröger 2017 [14]          | N                                                    | Y | Y | N | Y | Y | Y | Y | 75.0    |
| 15  | Leibundgut 2020 [15]      | Y                                                    | Y | Y | Y | Y | Y | Y | Y | 100.0   |
| 16  | Magor 2016 [16]           | Y                                                    | Y | Y | Y | N | N | Y | N | 62.5    |
| 17  | Martínez-Avilés 2012 [17] | Y                                                    | Y | Y | Y | N | N | Y | N | 62.5    |

|    |                        |   |   |   |   |   |   |   |   |       |
|----|------------------------|---|---|---|---|---|---|---|---|-------|
| 18 | Nischal 2013 [18]      | N | N | Y | Y | N | N | Y | N | 37.5  |
| 19 | O'Sullivan 2019 [19]   | N | N | Y | Y | Y | Y | Y | Y | 75.0  |
| 20 | Pardanani 2010 [20]    | Y | Y | Y | Y | N | N | Y | N | 62.5  |
| 21 | Patel 2015 [21]        | N | N | Y | Y | Y | Y | Y | Y | 75.0  |
| 22 | Patriarca 2013 [22]    | Y | Y | Y | Y | Y | Y | Y | Y | 100.0 |
| 23 | Saint-Martin 2009 [23] | Y | N | Y | Y | Y | Y | Y | Y | 87.5  |
| 24 | Schlenk 2016 [24]      | Y | Y | N | Y | Y | Y | Y | Y | 87.5  |
| 25 | Schnittger 2012 [25]   | N | N | Y | N | N | N | Y | N | 25.0  |
| 26 | Segura-Díaz 2020 [26]  | Y | Y | Y | Y | Y | Y | Y | Y | 100.0 |
| 27 | Song 2017 [27]         | Y | N | Y | Y | N | N | Y | N | 50.0  |
| 28 | Tefferi 2009 [28]      | Y | Y | Y | Y | Y | Y | Y | Y | 100.0 |
| 29 | Tefferi 2010 [29]      | Y | Y | Y | Y | Y | Y | Y | Y | 100.0 |
| 30 | Tefferi 2016 [30]      | Y | Y | Y | Y | Y | Y | Y | Y | 100.0 |
| 31 | Tefferi 2016a [31]     | Y | Y | Y | Y | Y | Y | Y | Y | 100.0 |
| 32 | Verger 2014 [32]       | N | N | Y | N | N | N | Y | N | 25.0  |
| 33 | Zhang 2015 [33]        | Y | Y | Y | Y | Y | Y | Y | Y | 100.0 |

1. Were the criteria for inclusion in the sample clearly defined? 2. Were the study subjects and the setting described in detail? 3. Was the exposure measured in a valid and reliable way? 4. Were objective, standard criteria used for measurement of the condition? 5. Were confounding factors identified? 6. Were strategies to deal with confounding factors stated? 7. Were the outcomes measured in a valid and reliable way? 8. Was appropriate statistical analysis used? Y=Yes; N=No; U=Unclear

**Table S3.** Quality assessment of the included case-control studies.

| No. | Study ID          | Questions assessing included case-control studies |   |   |   |   |   |   |   |   |    | Yes (%) |
|-----|-------------------|---------------------------------------------------|---|---|---|---|---|---|---|---|----|---------|
|     |                   | 1                                                 | 2 | 3 | 4 | 5 | 6 | 7 | 8 | 9 | 10 |         |
| 1   | Bartels 2019 [34] | Y                                                 | Y | Y | Y | Y | Y | Y | Y | Y | N  | 90.0    |
| 2   | Nielsen 2017 [35] | N                                                 | N | N | Y | Y | N | N | Y | Y | N  | 40.0    |

1. Were the groups comparable other than the presence of disease in caseNs or the absence of disease in controls? 2. Were cases and controls matched appropriately? 3. Were the same criteria used for identification of cases and controls? 4. Was exposure measured in a standard, valid and reliable way? 5. Was exposure measured in the same way for cases and controls? 6. Were confounding factors identified? 7. Were strategies to deal with confounding factors stated? 8. Were outcomes assessed in a standard, valid and reliable way for cases and controls? 9. Was the exposure period of interest long enough to be meaningful? 10. Was appropriate statistical analysis used? Y=Yes; N=No; U=Unclear

A

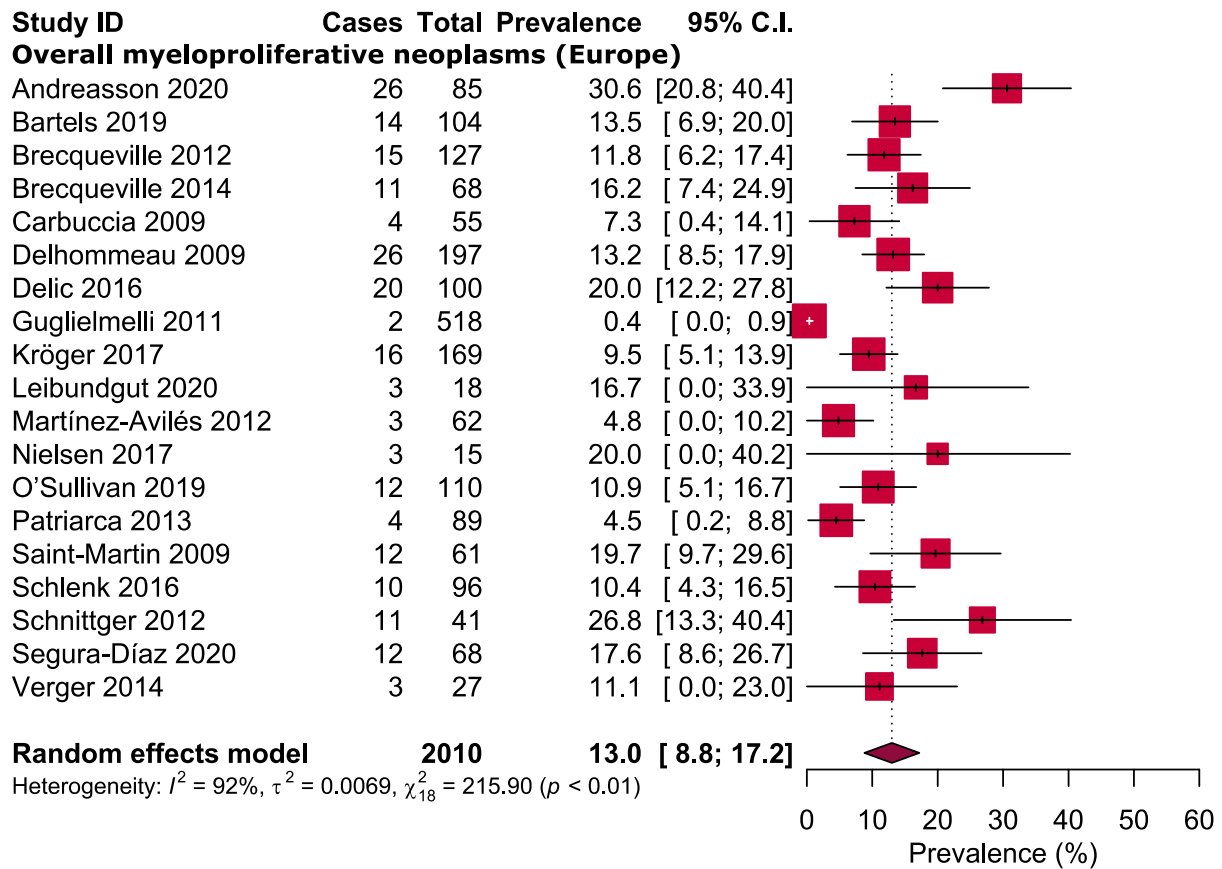

B

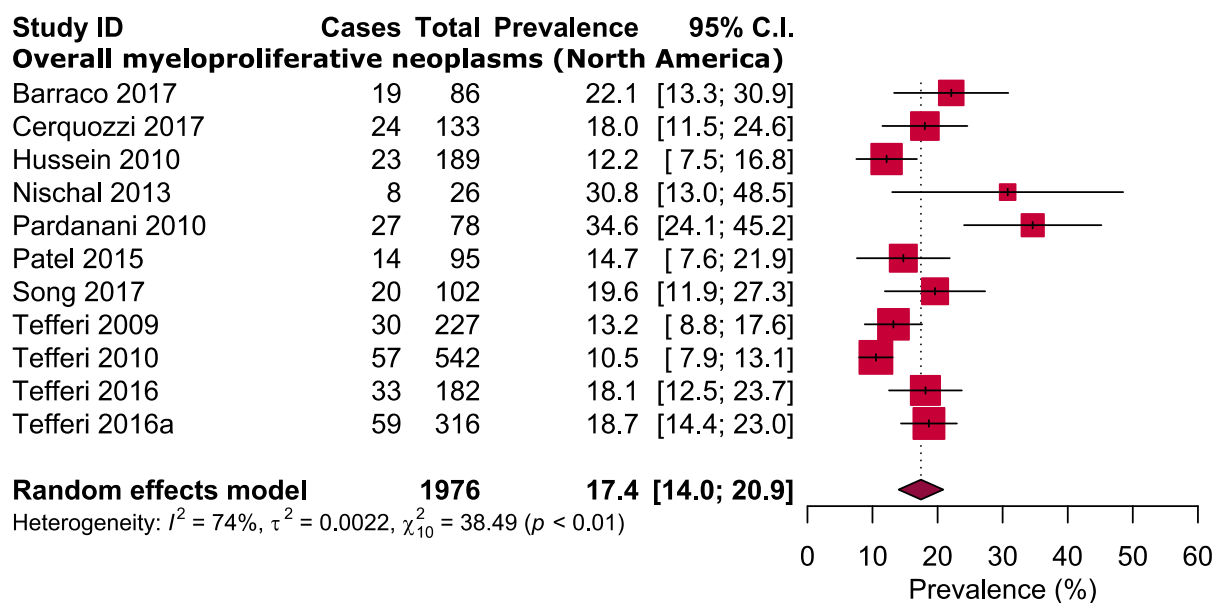

C

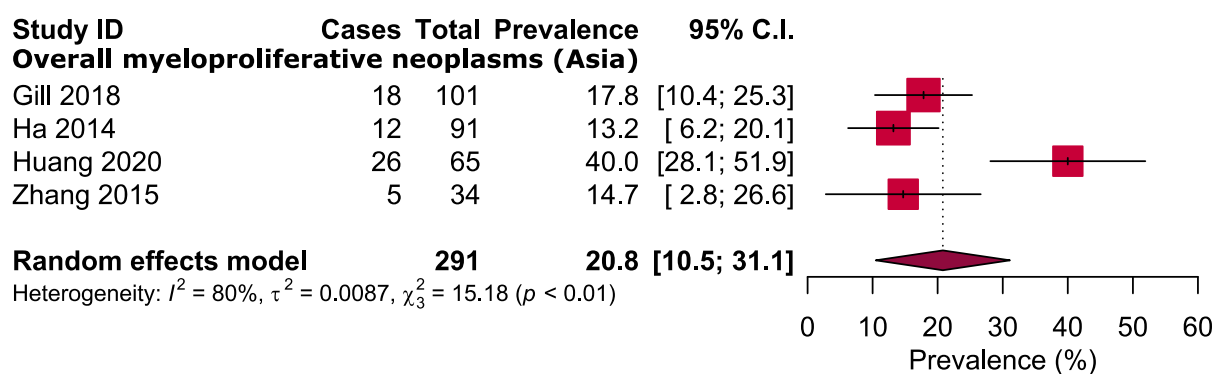

D

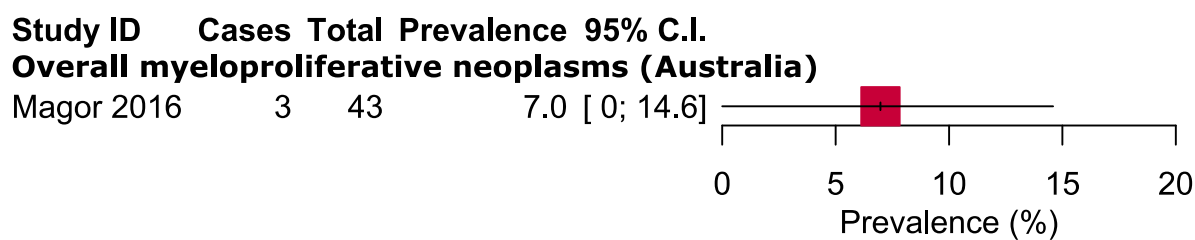

E

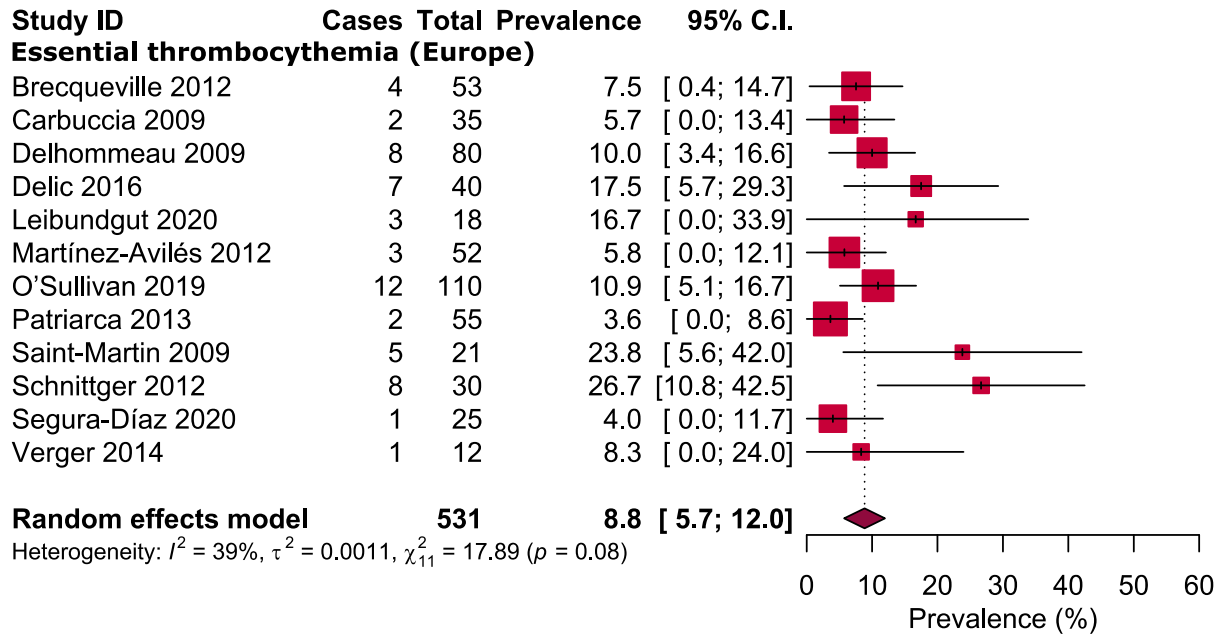

F

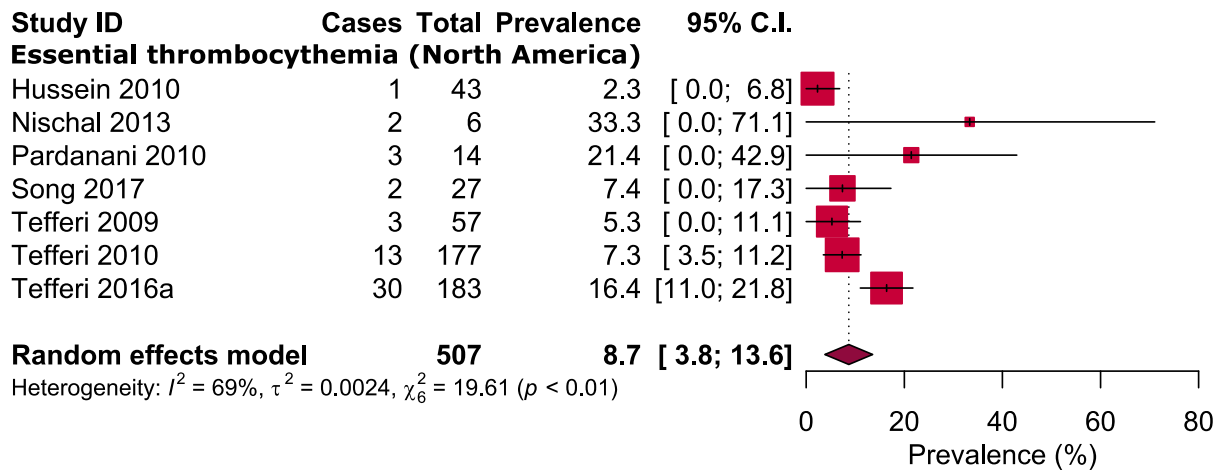

G

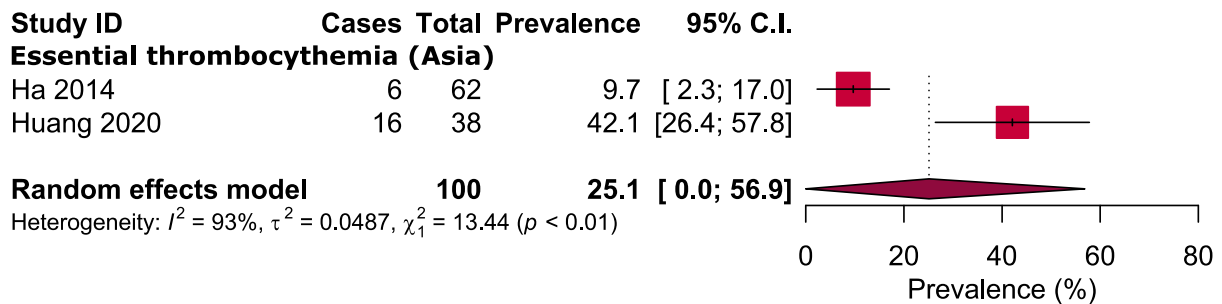

H

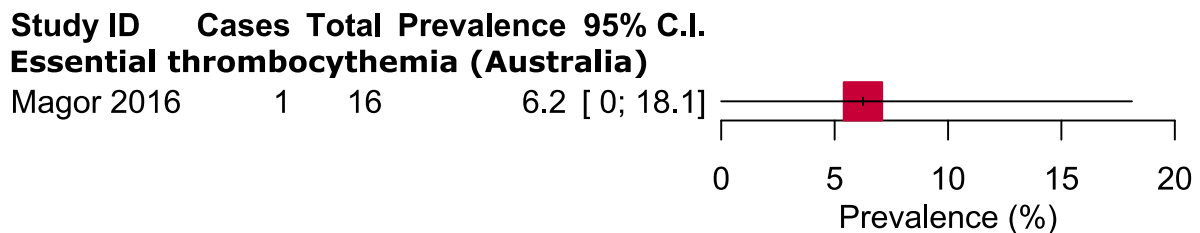

I

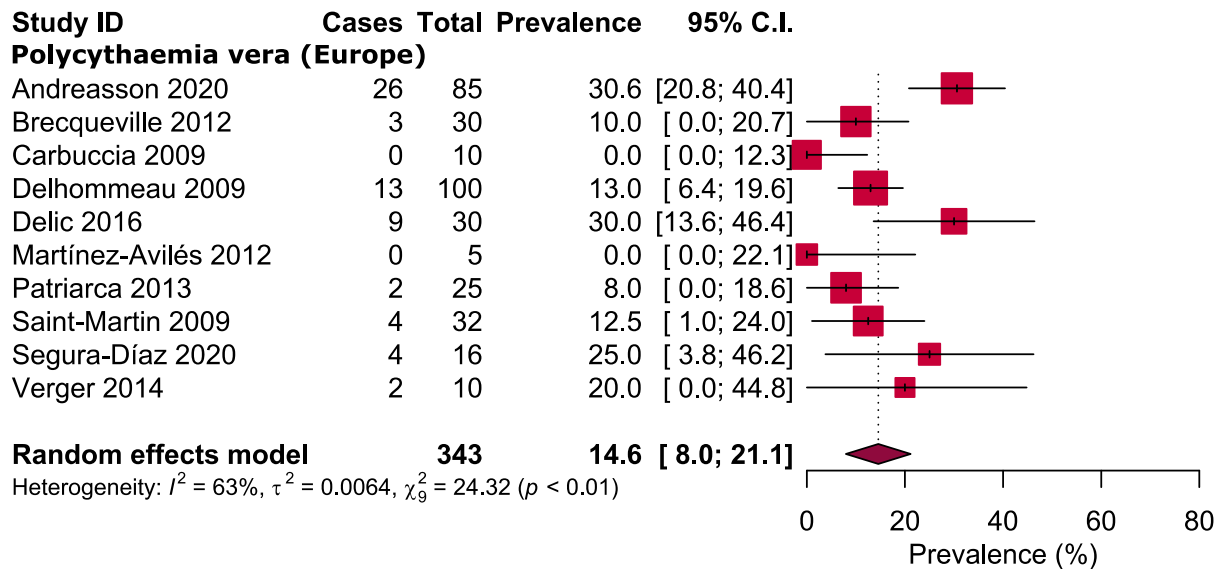

J

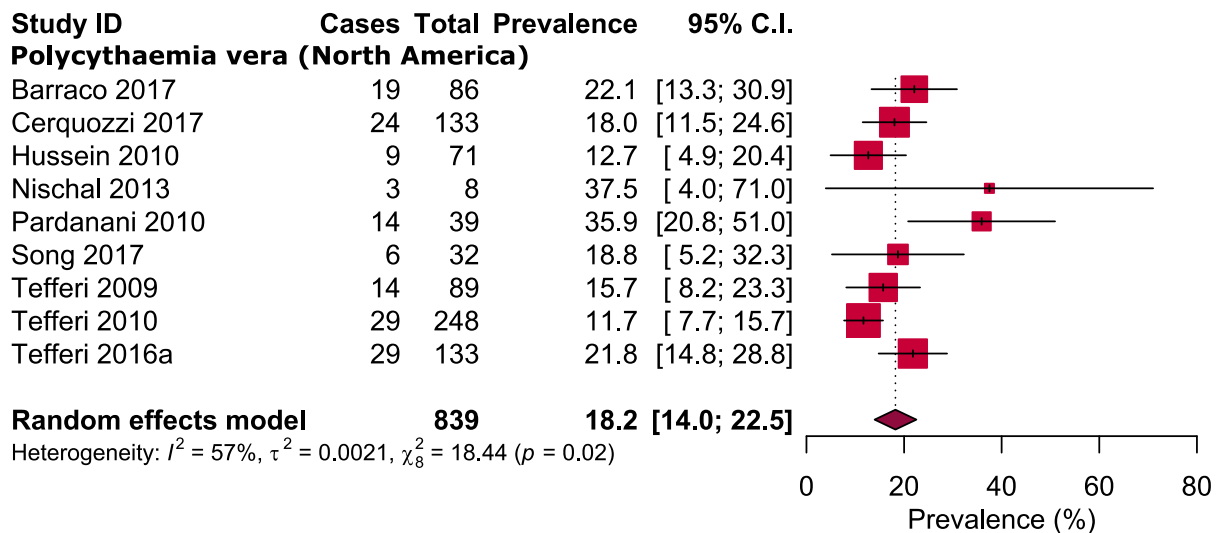

K

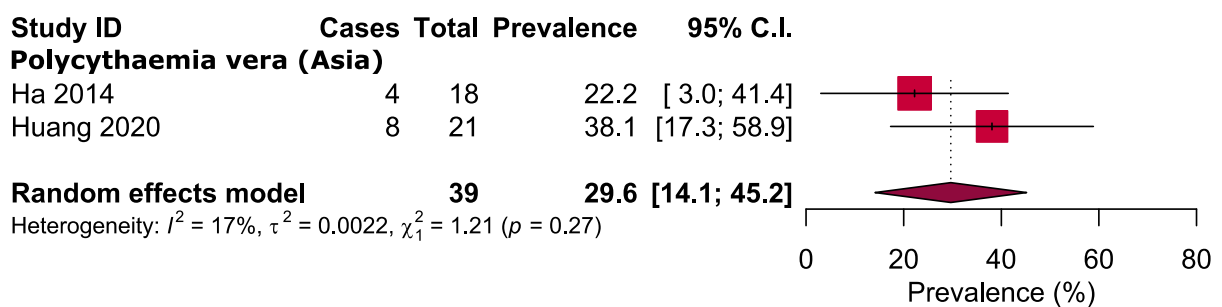

L

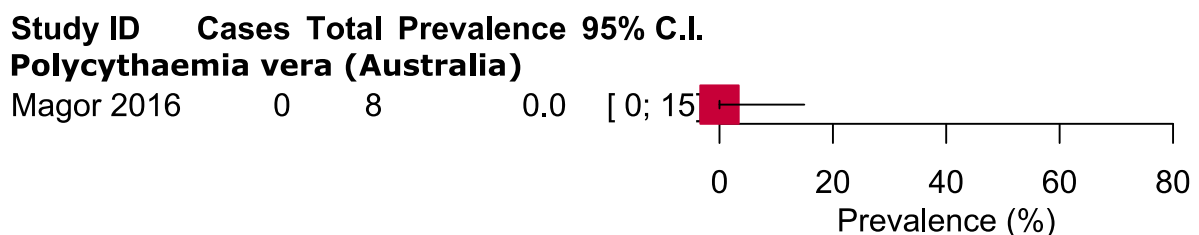

M

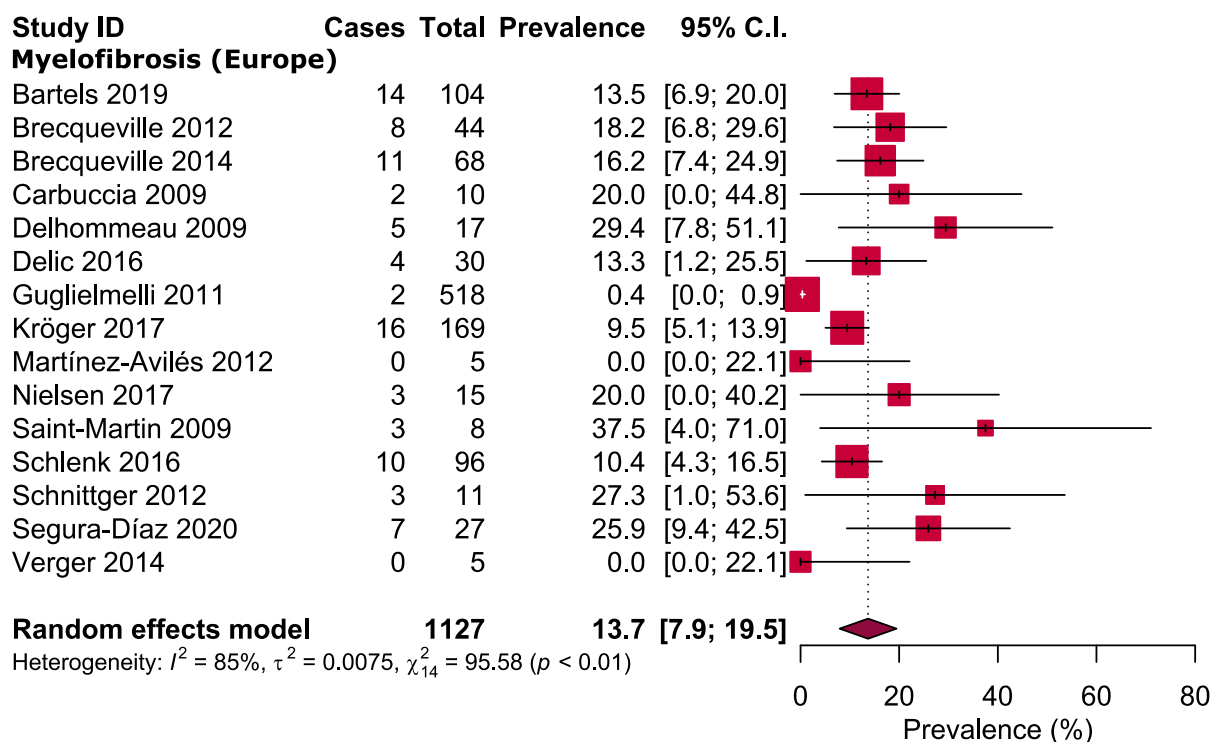

N

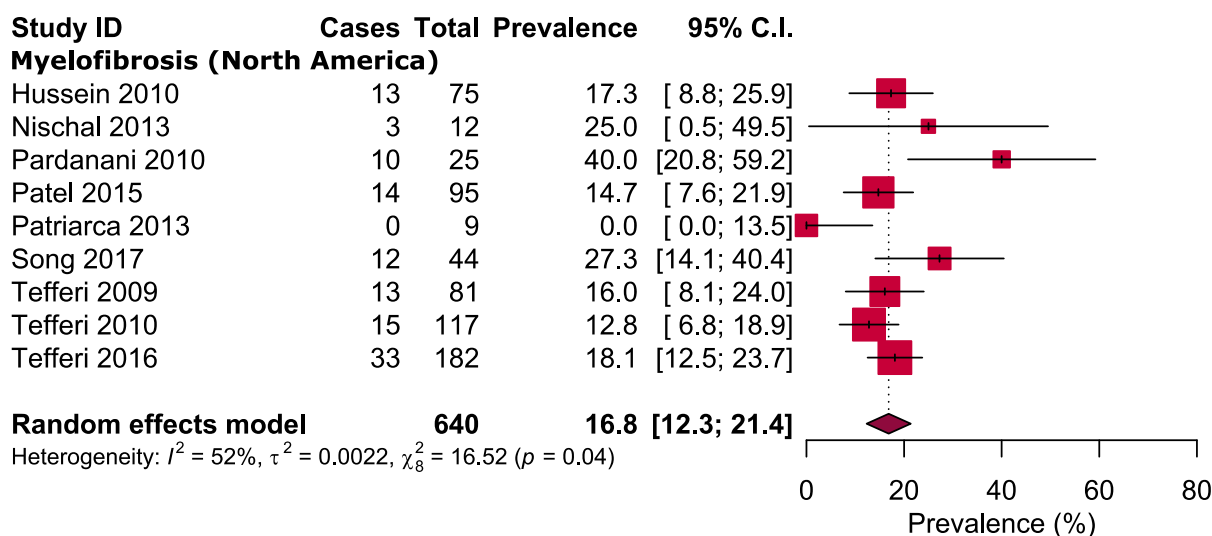

O

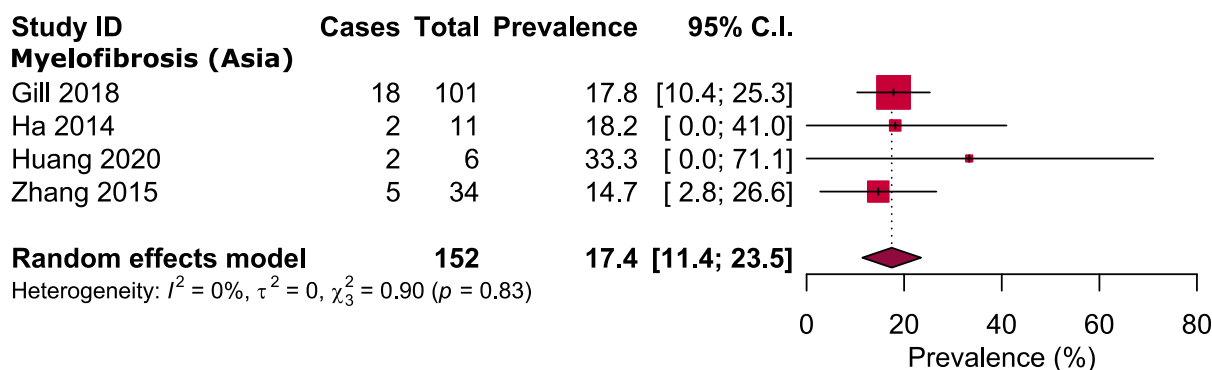

P

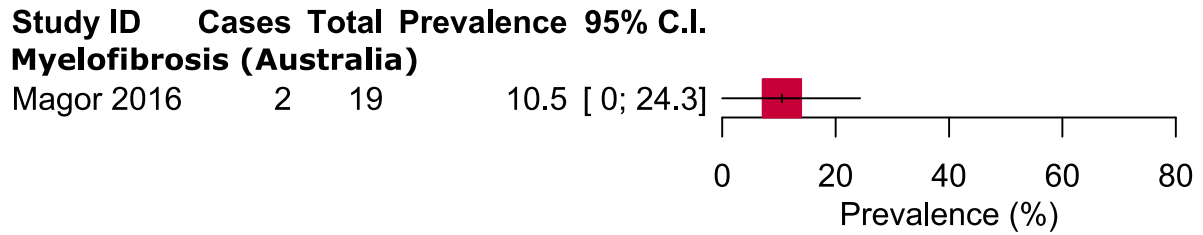Figure S1. Prevalence of *TET2* gene mutations based on continents.

A

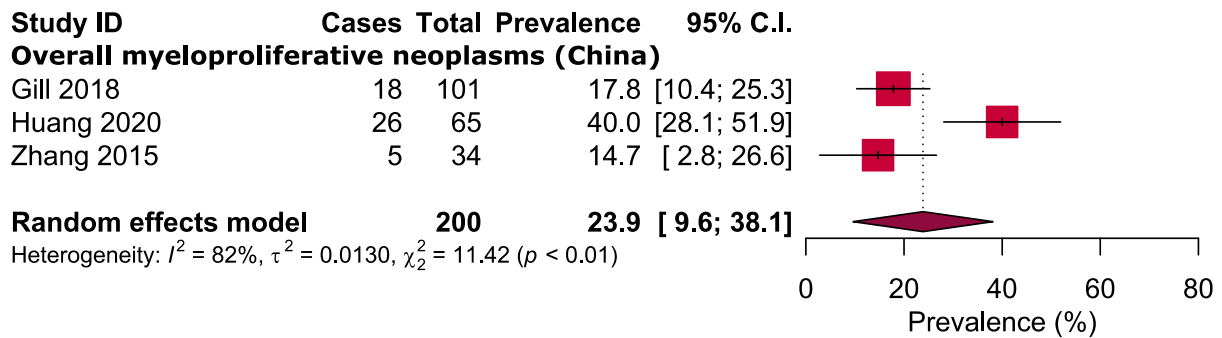

B

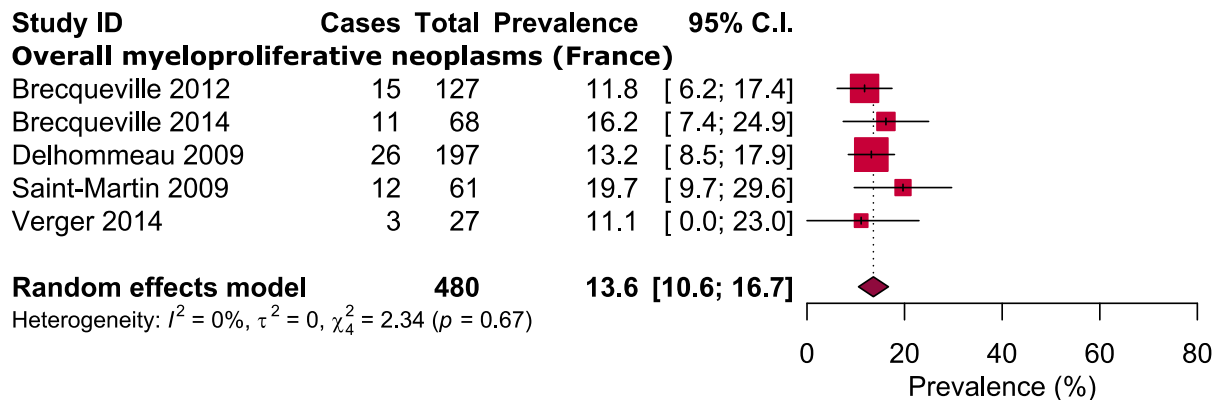

C

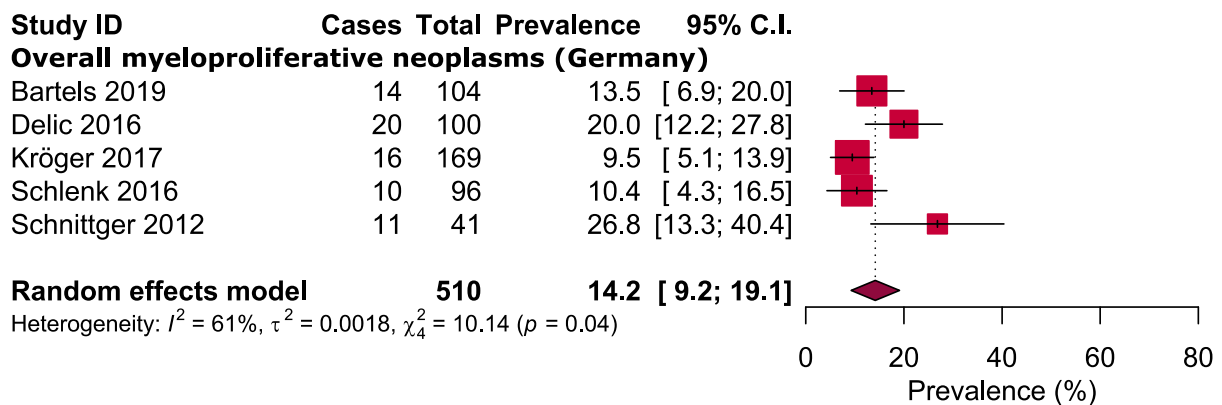



D

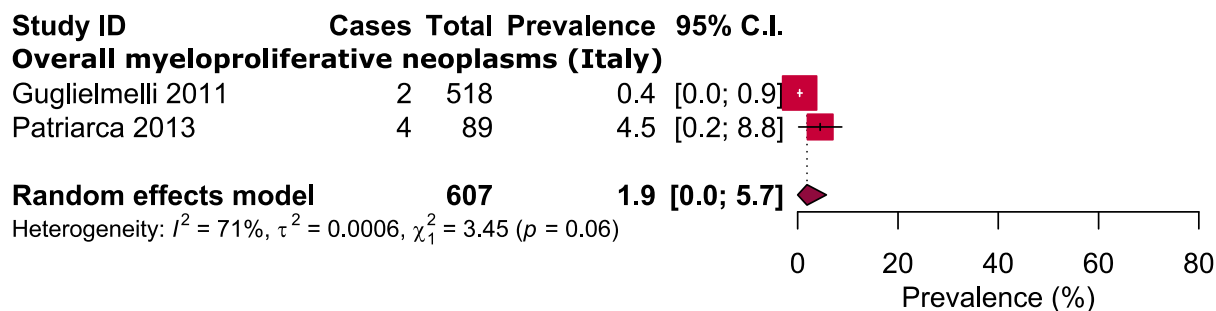

E

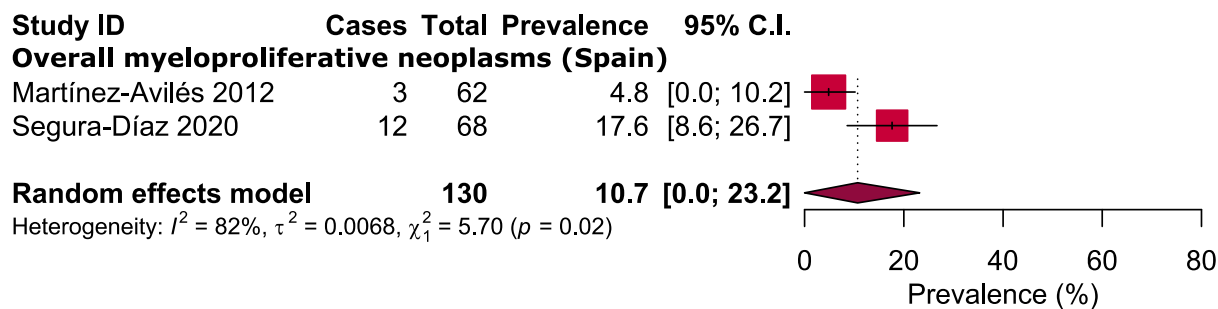

F

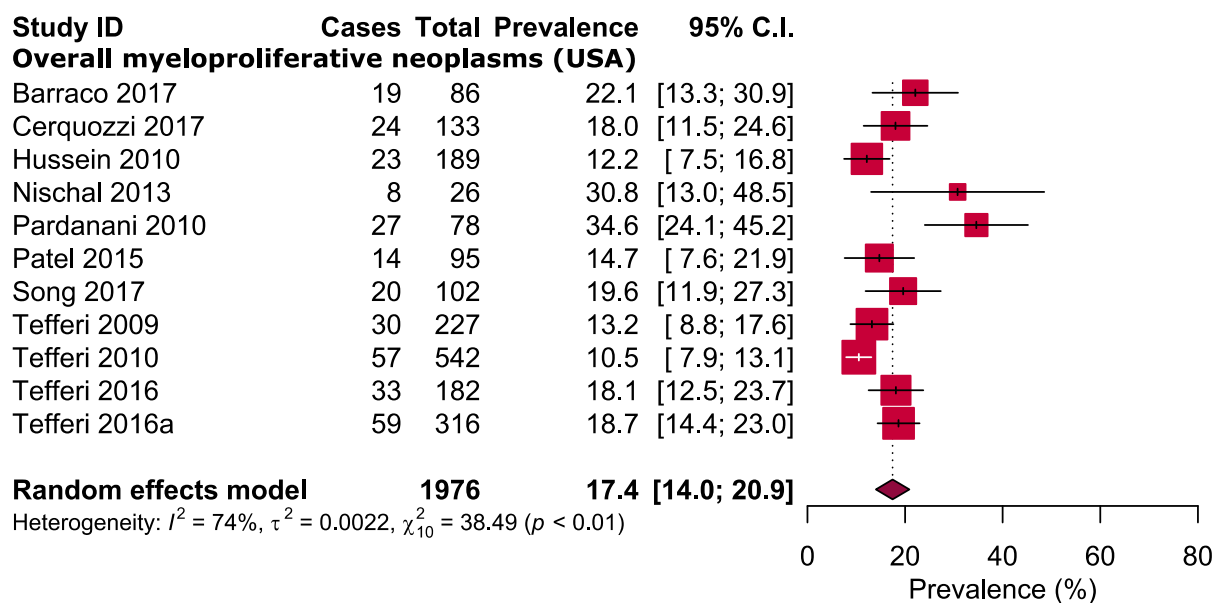

G

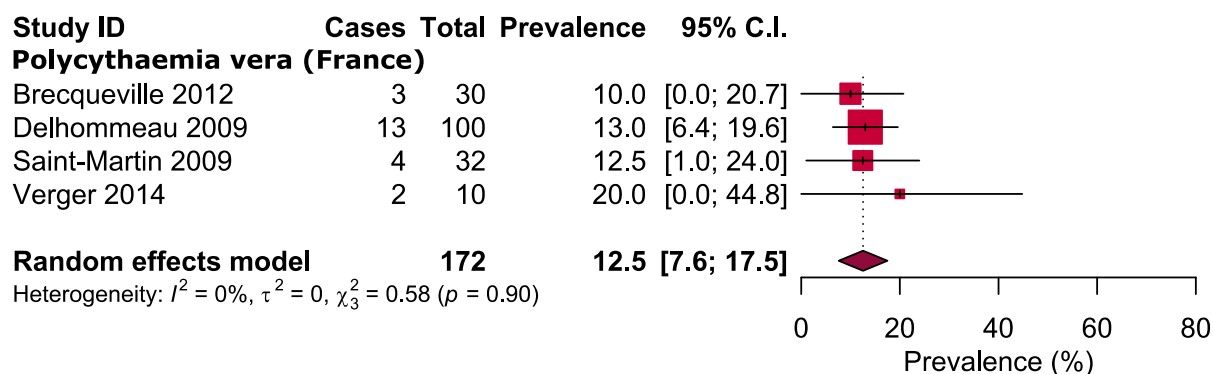

H

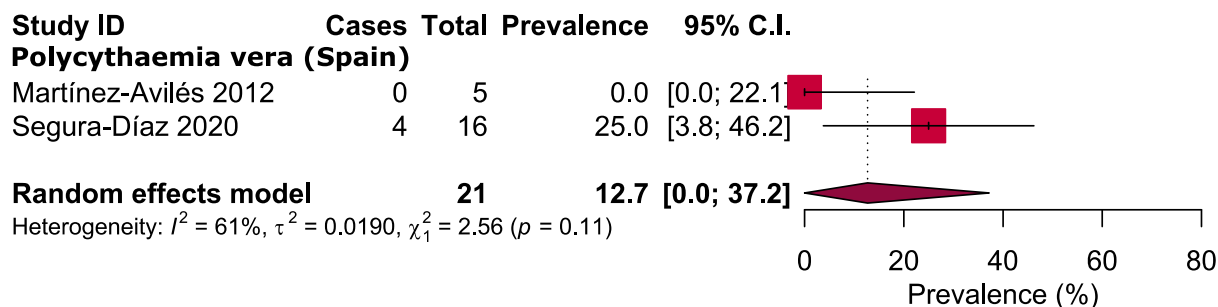

I

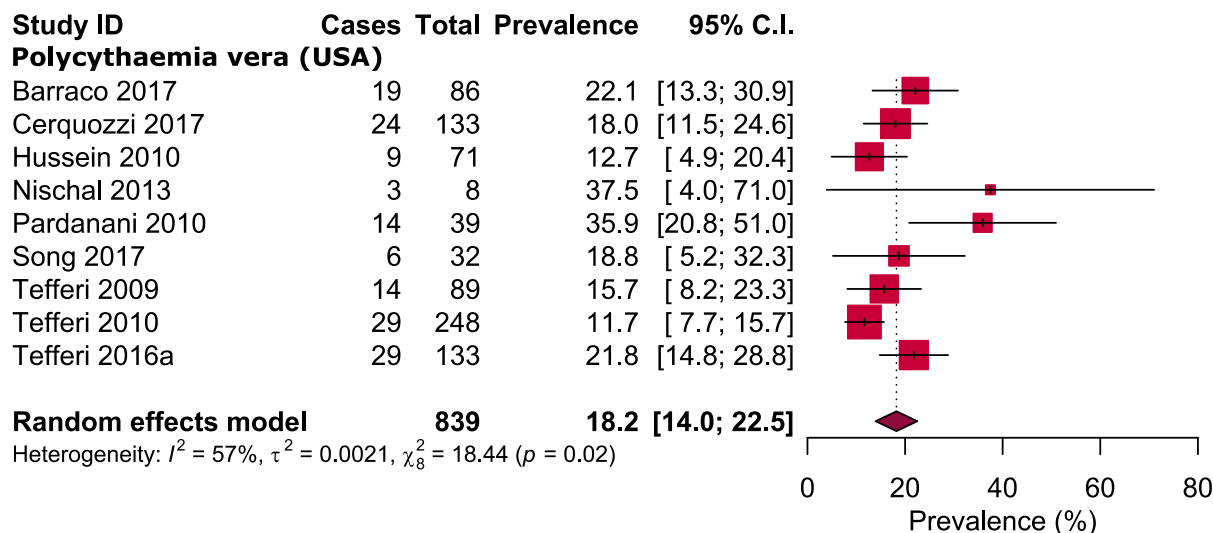

J

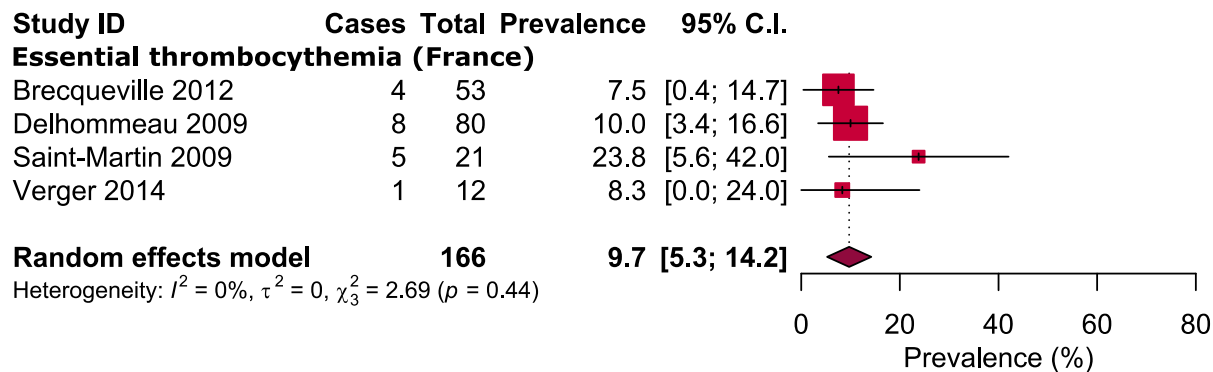

K

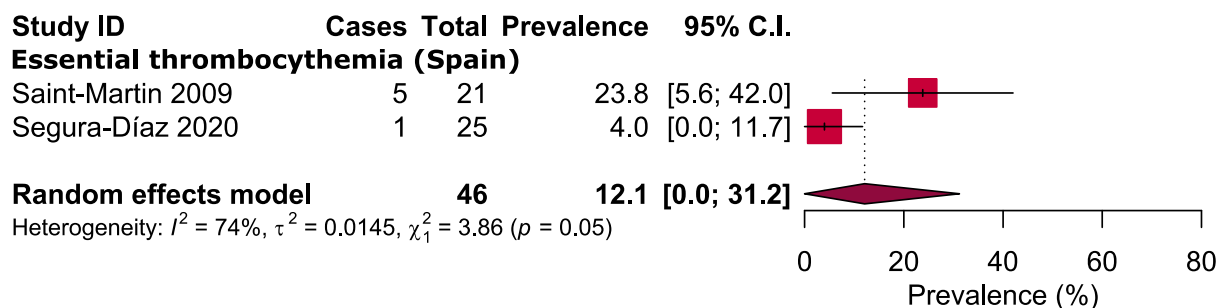

L

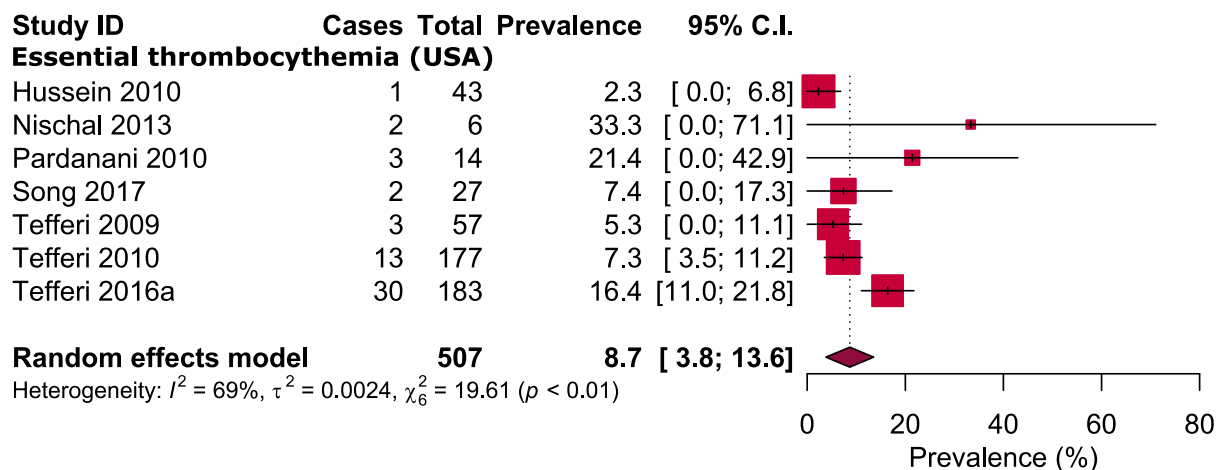

M

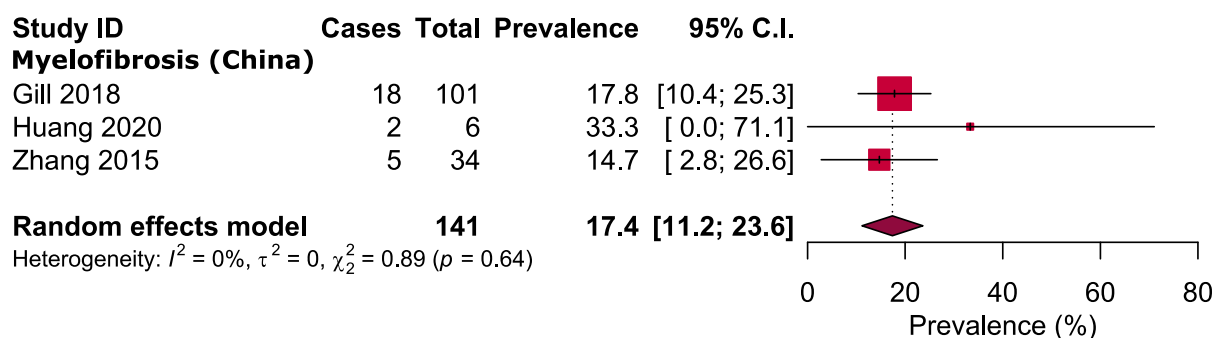

N

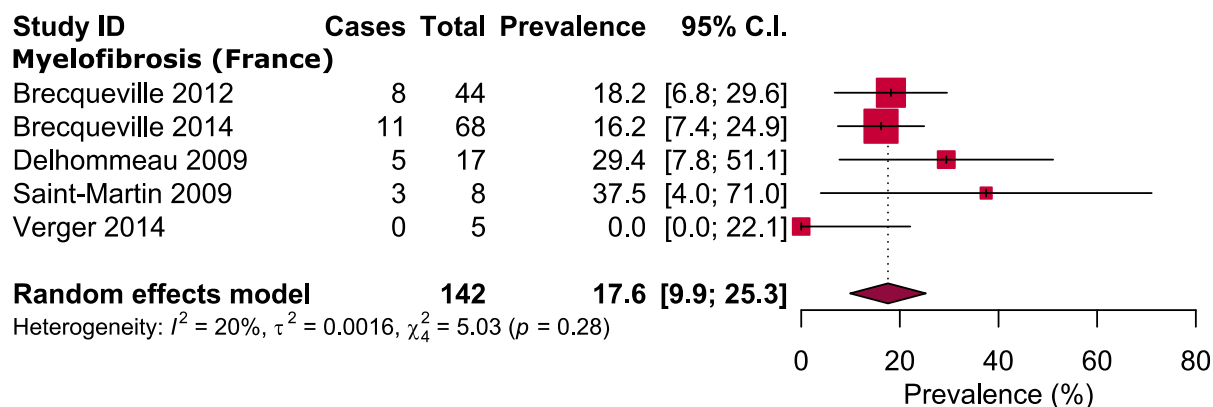

O

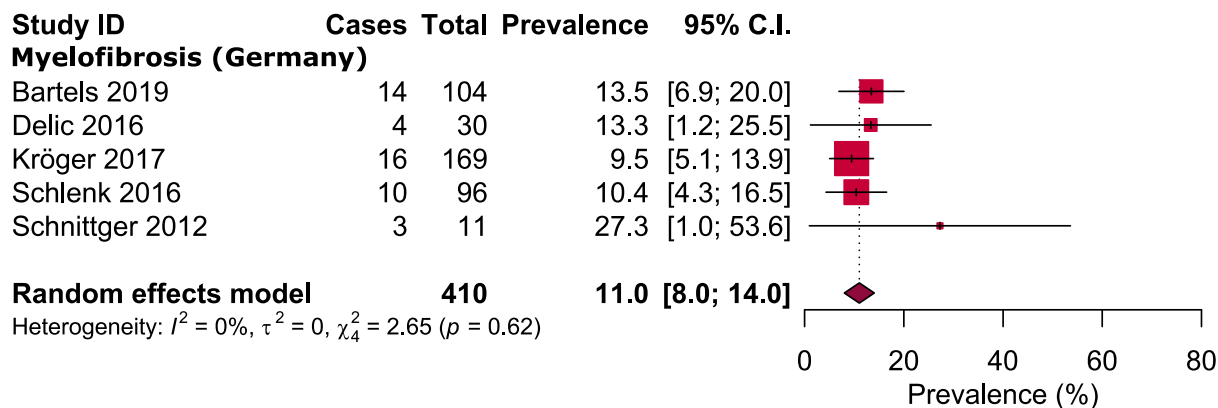

P

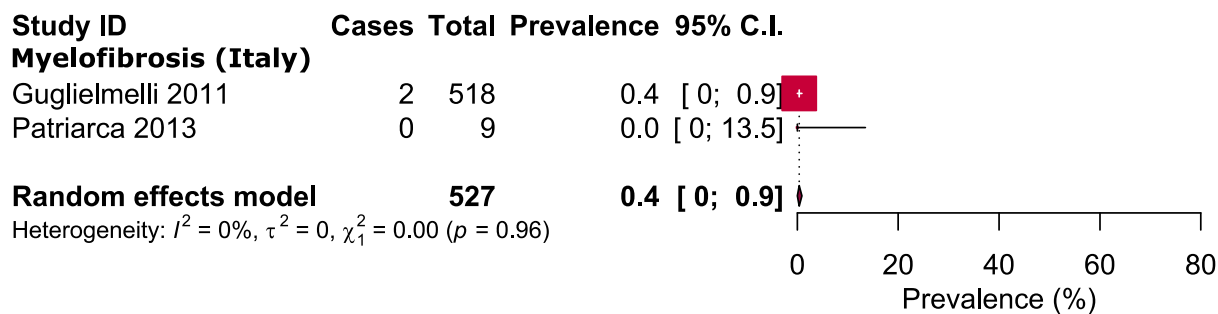

Q

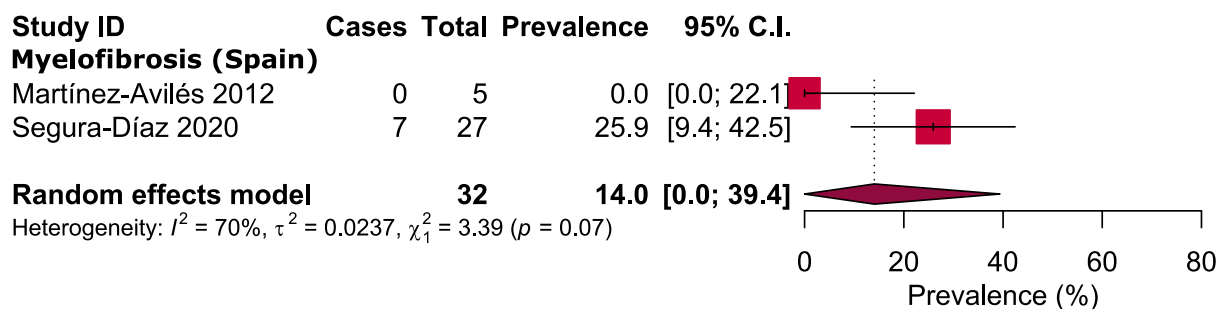

R

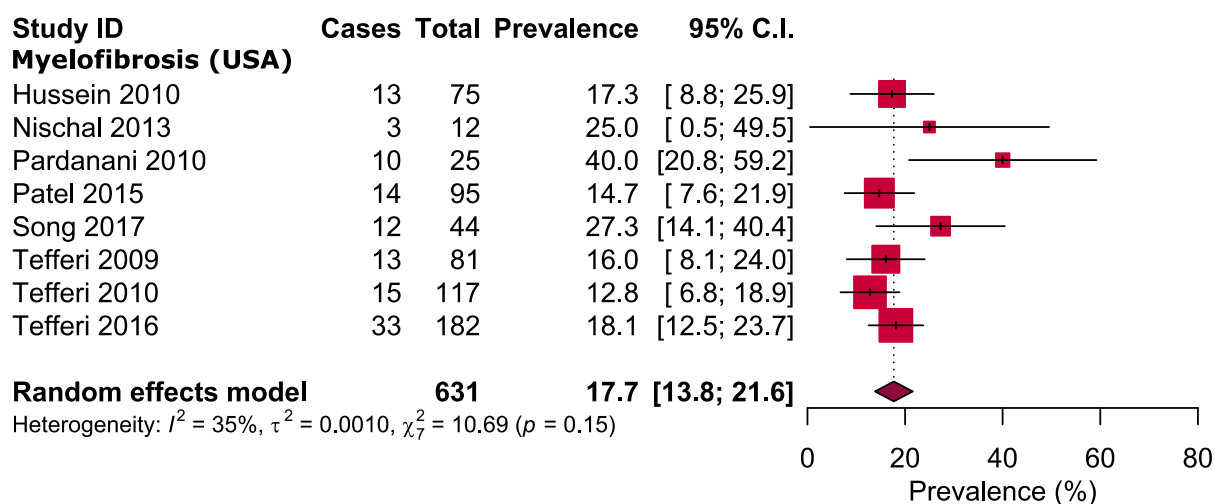

Figure S2. Prevalence of *TET2* gene mutations based on countries.

A

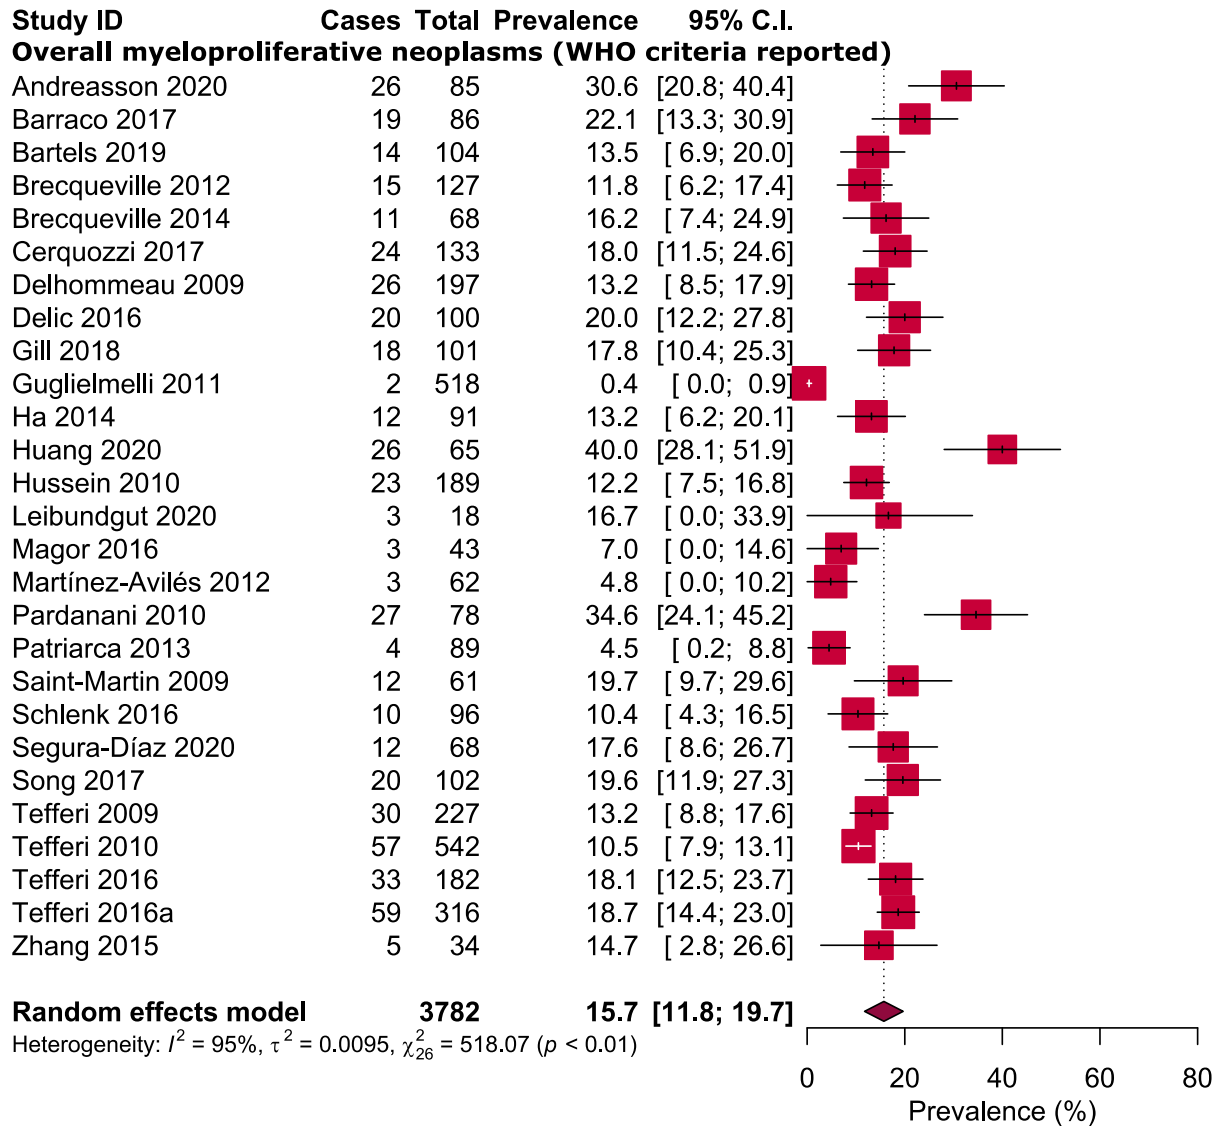

B

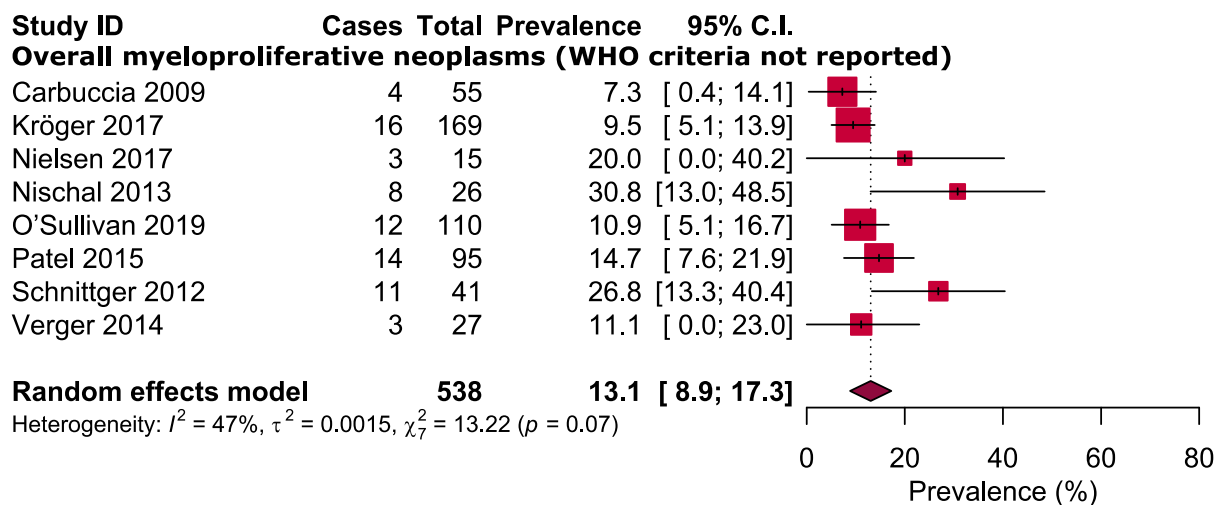

C

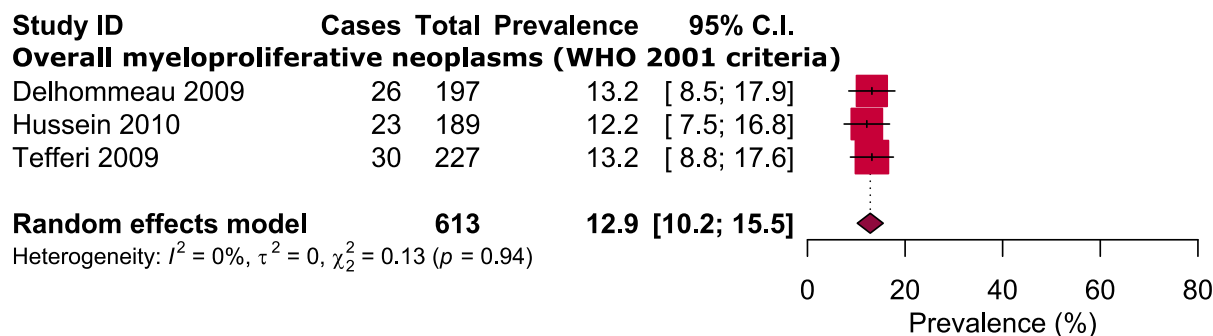

D

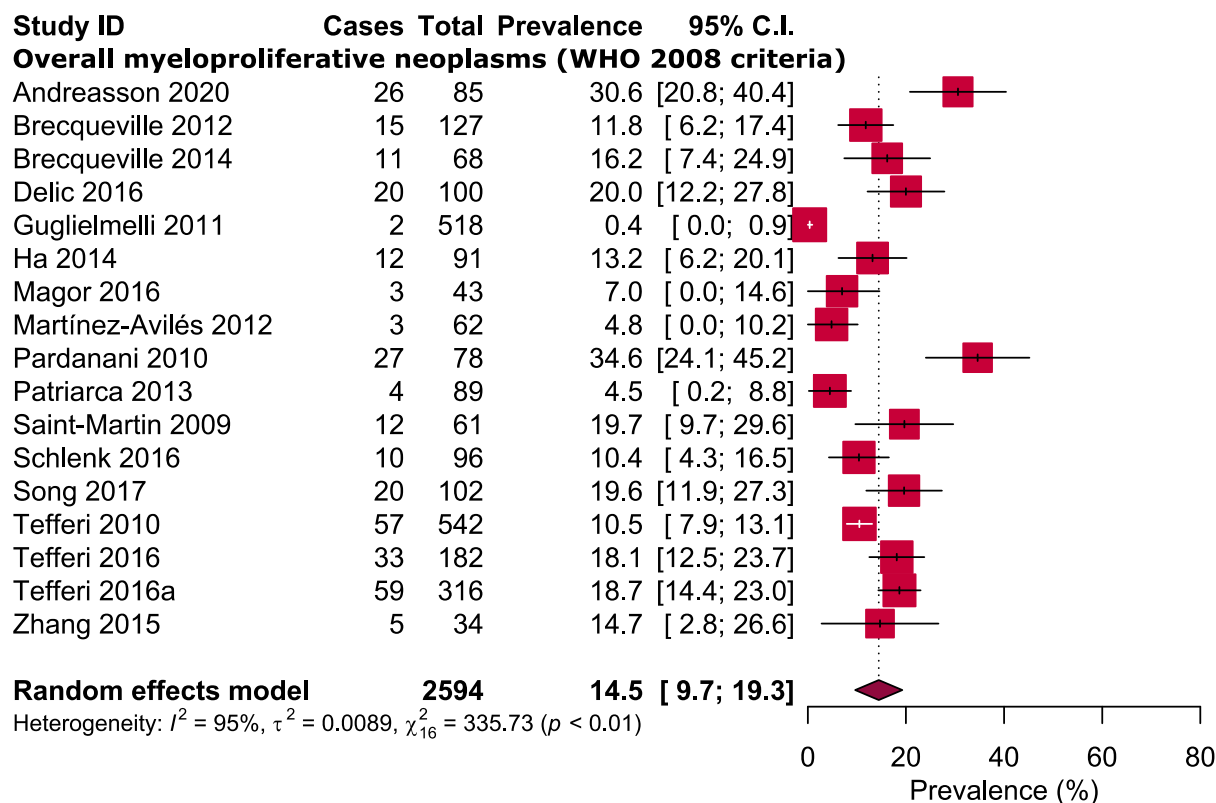

E

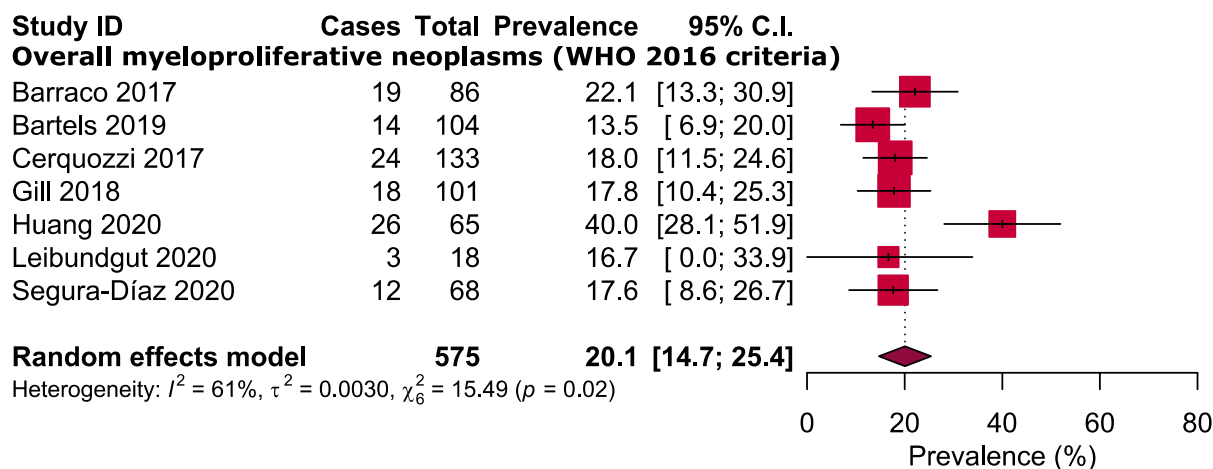

F

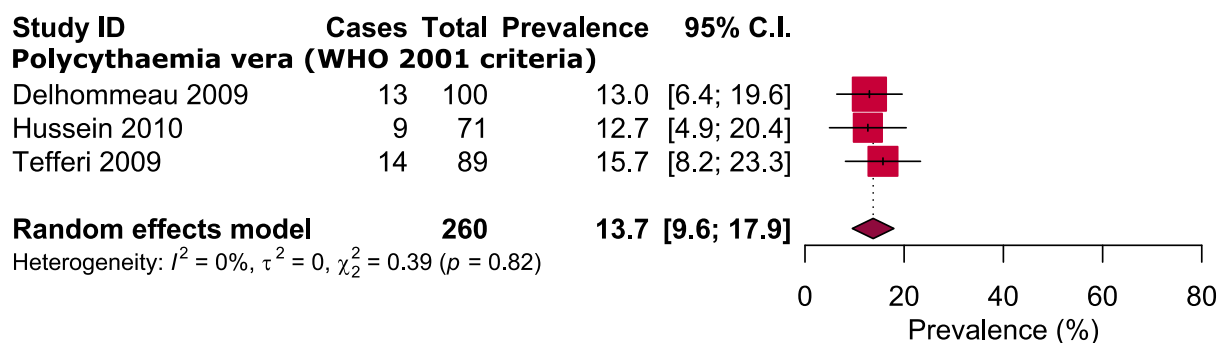

G

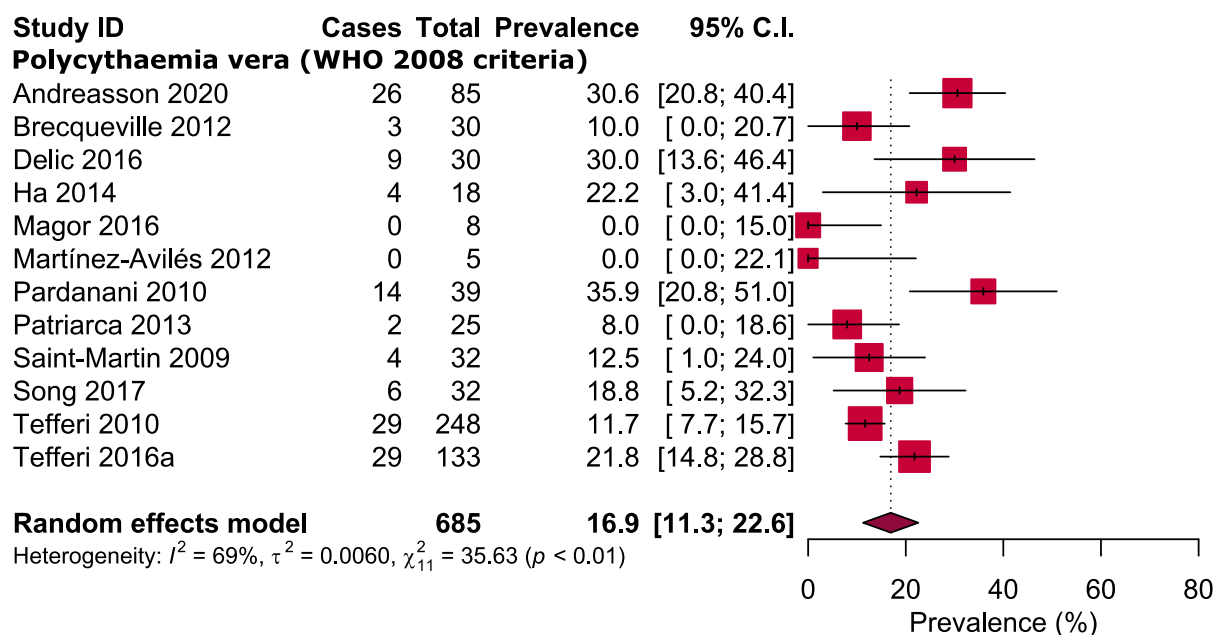

H

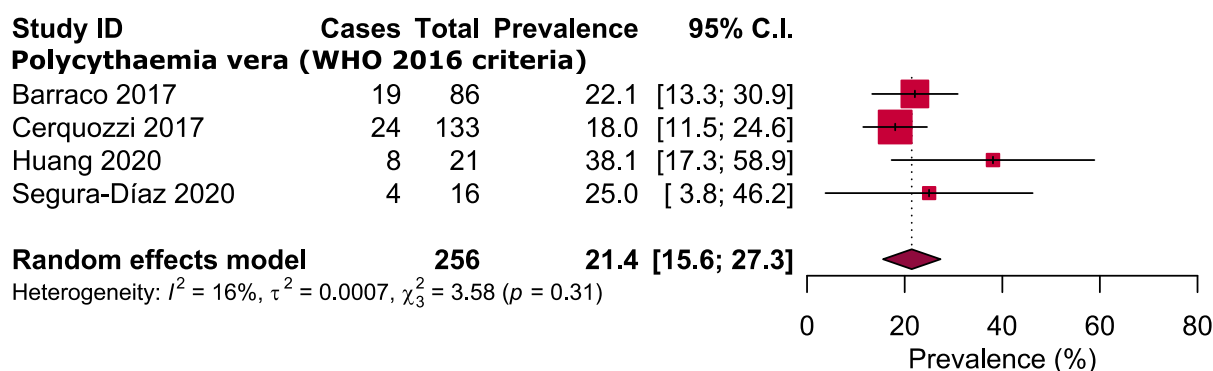

I

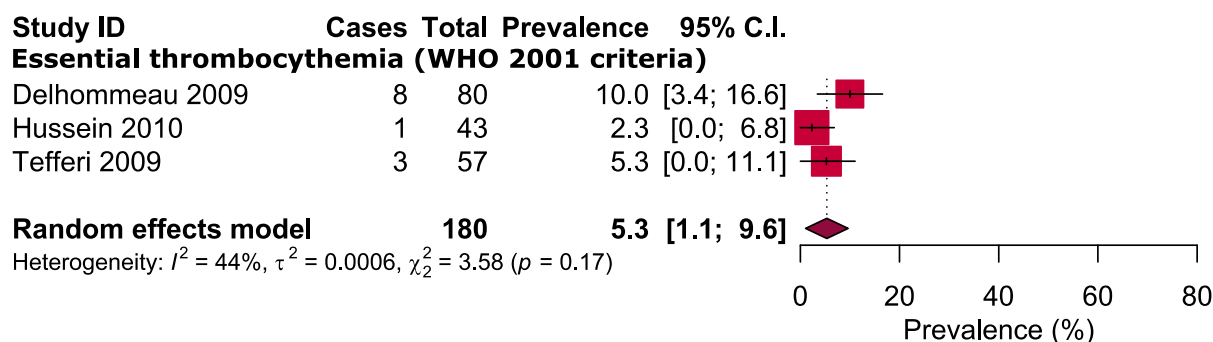

J

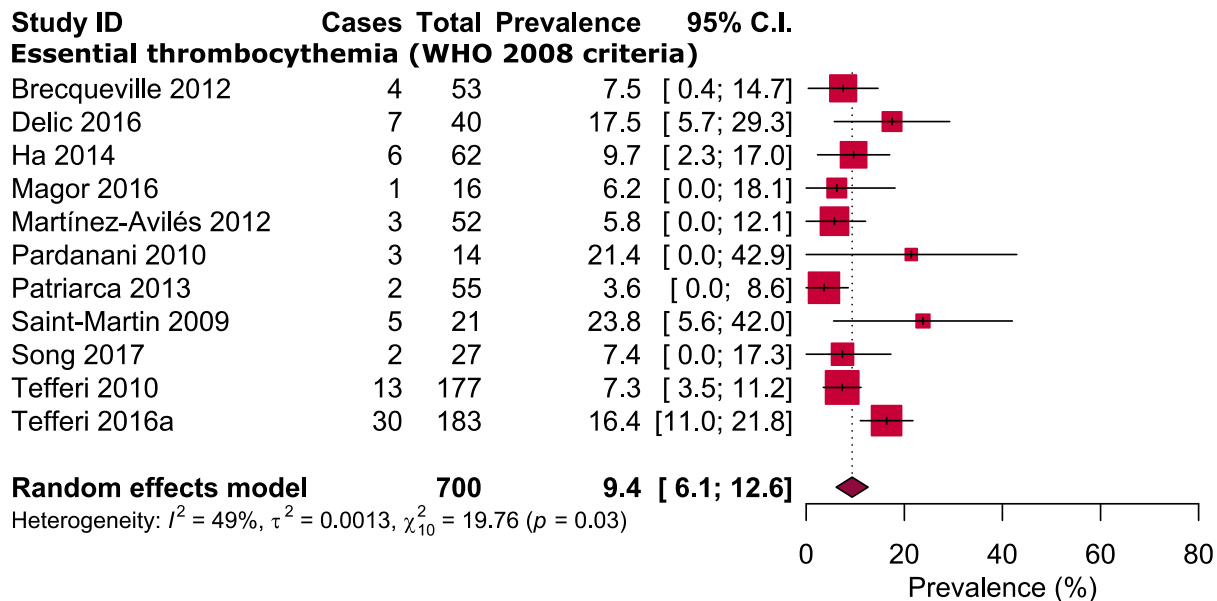

K

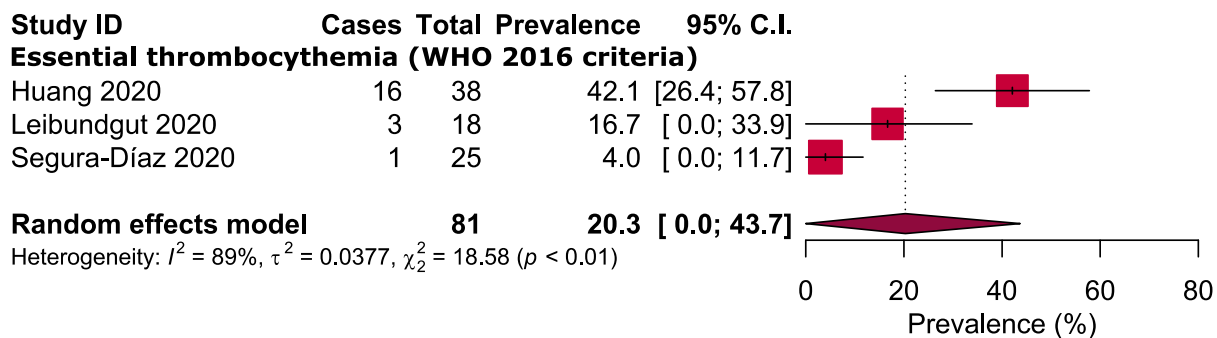

L

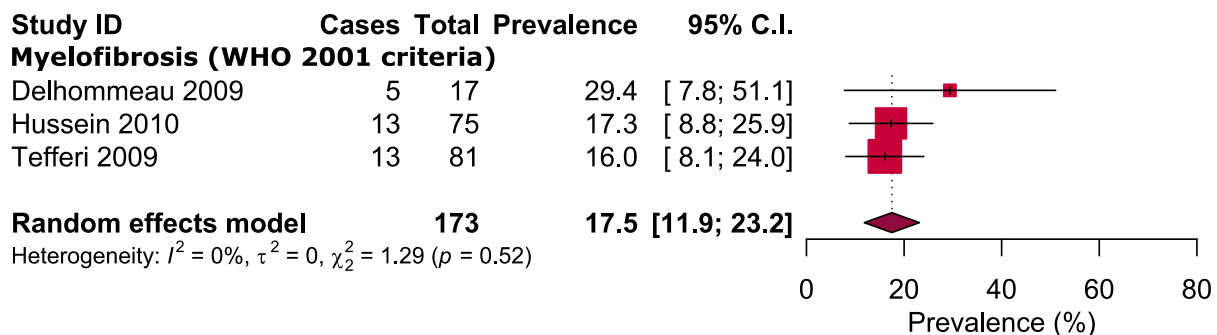



M

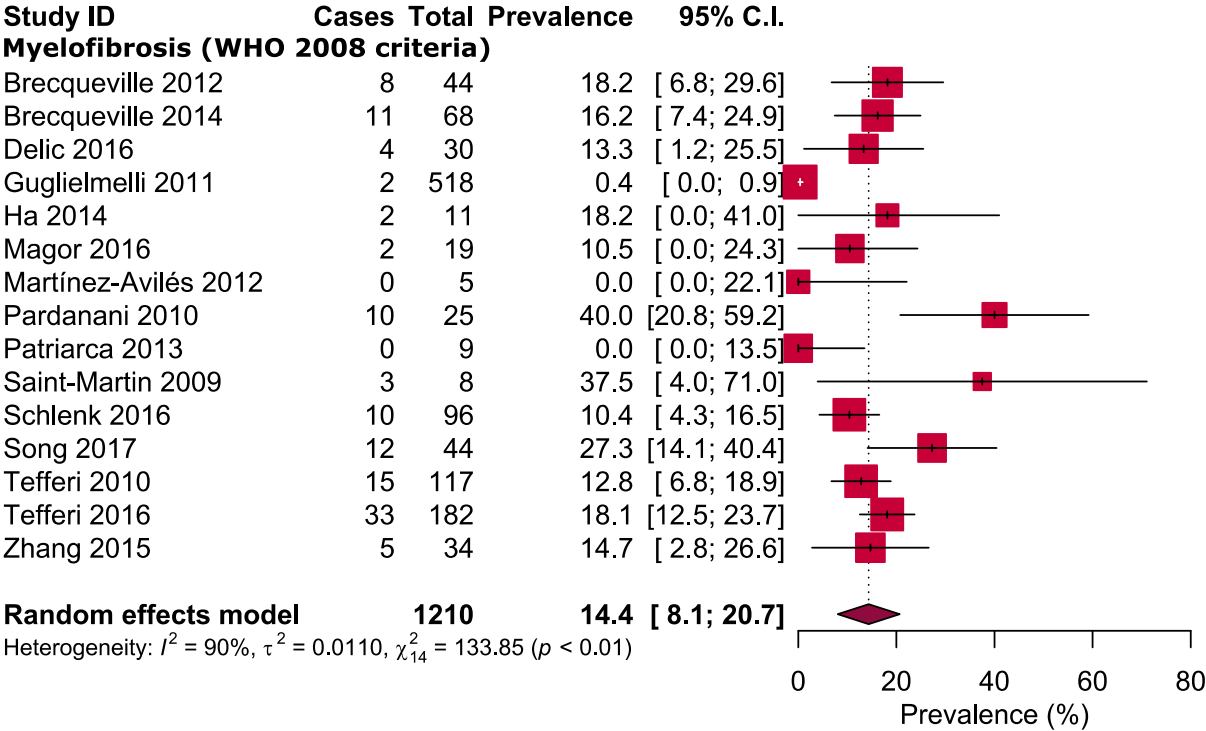

N

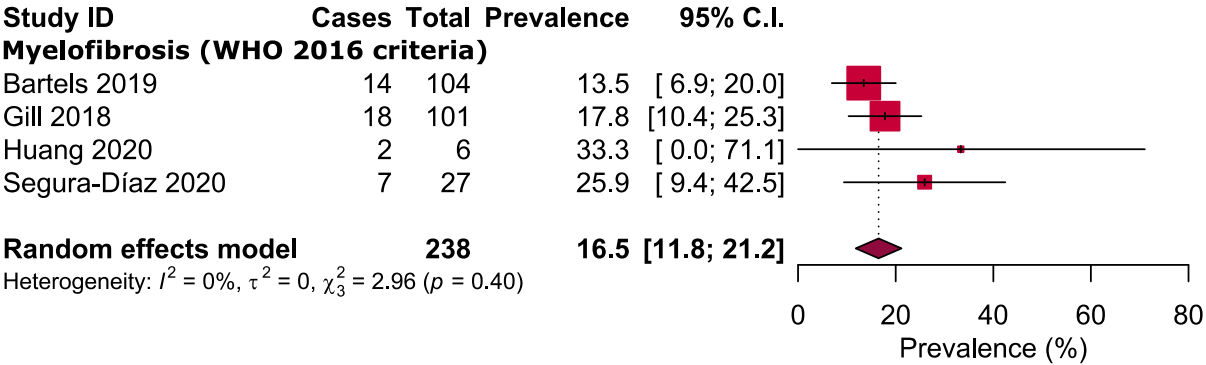

**Figure S3.** Prevalence of *TET2* gene mutations based on the WHO classification and diagnostic criteria of MPN.

A

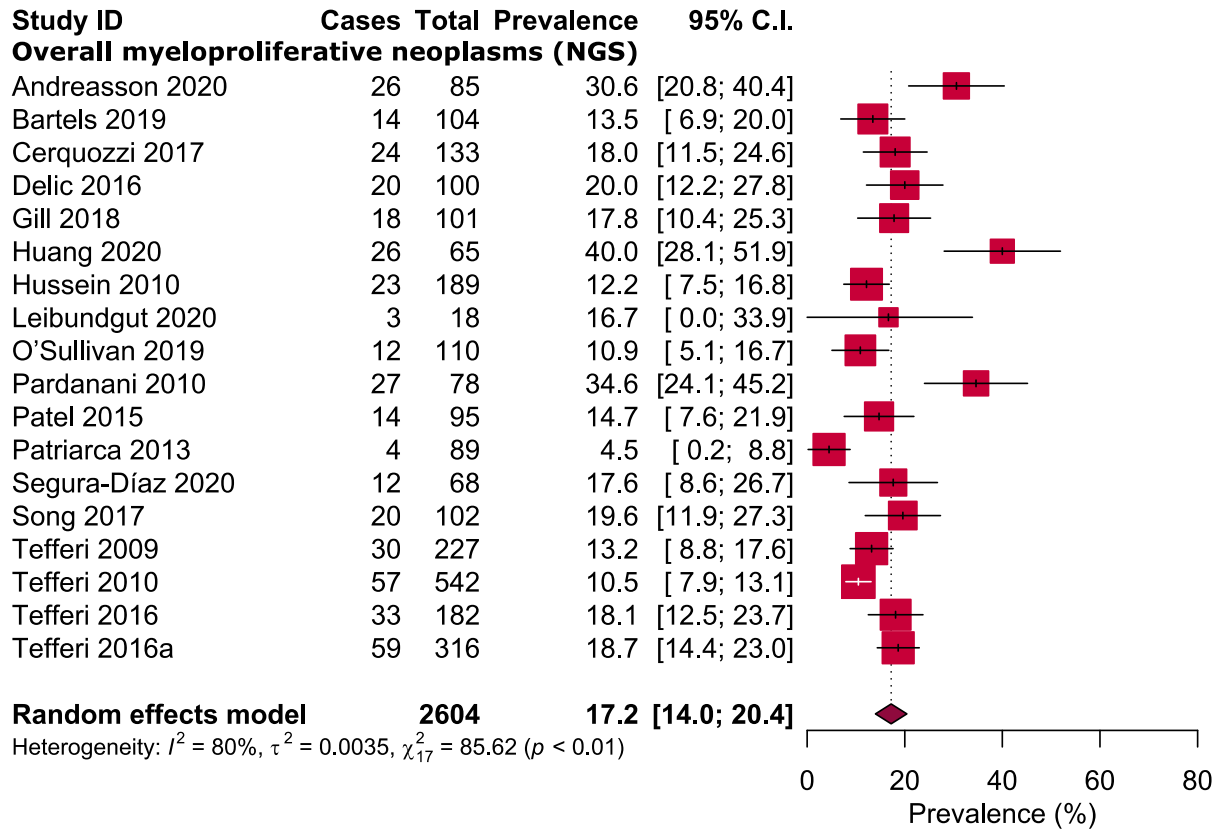

B

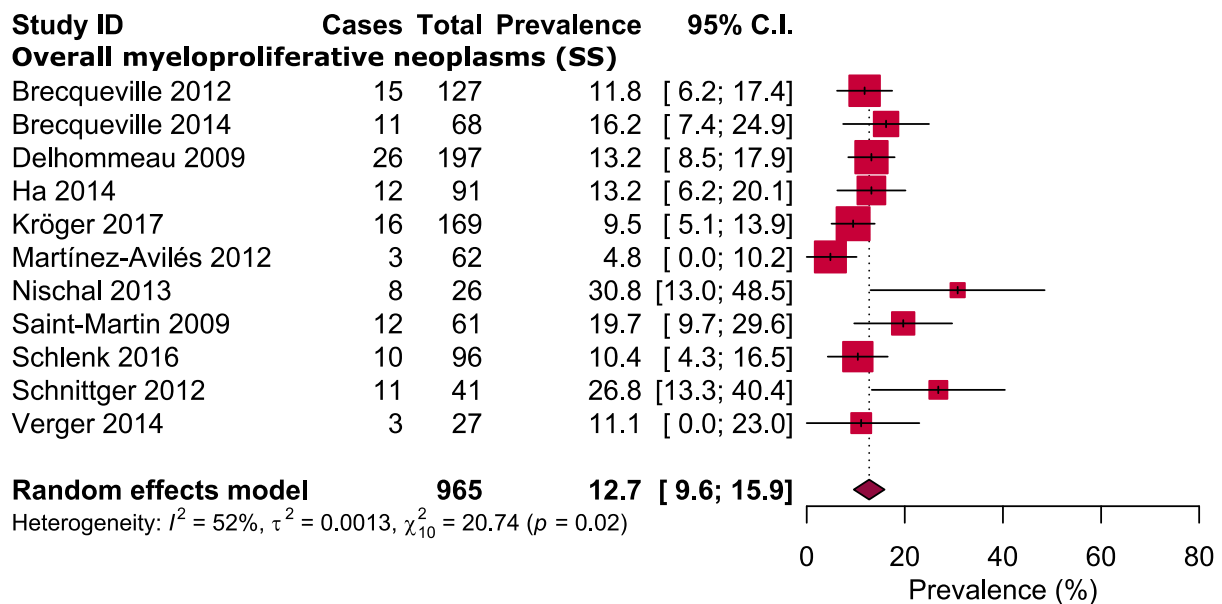

C

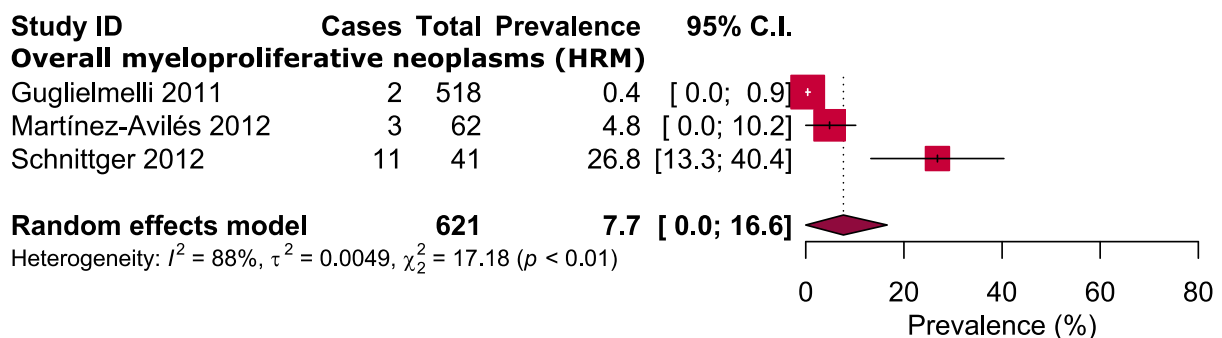

D

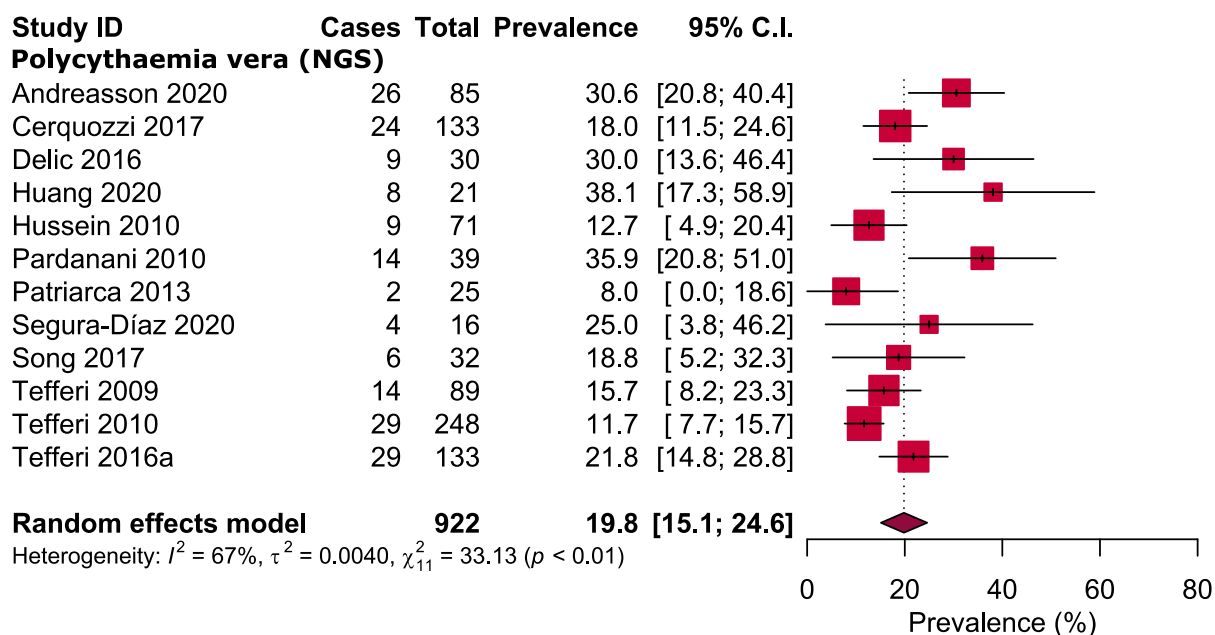

E

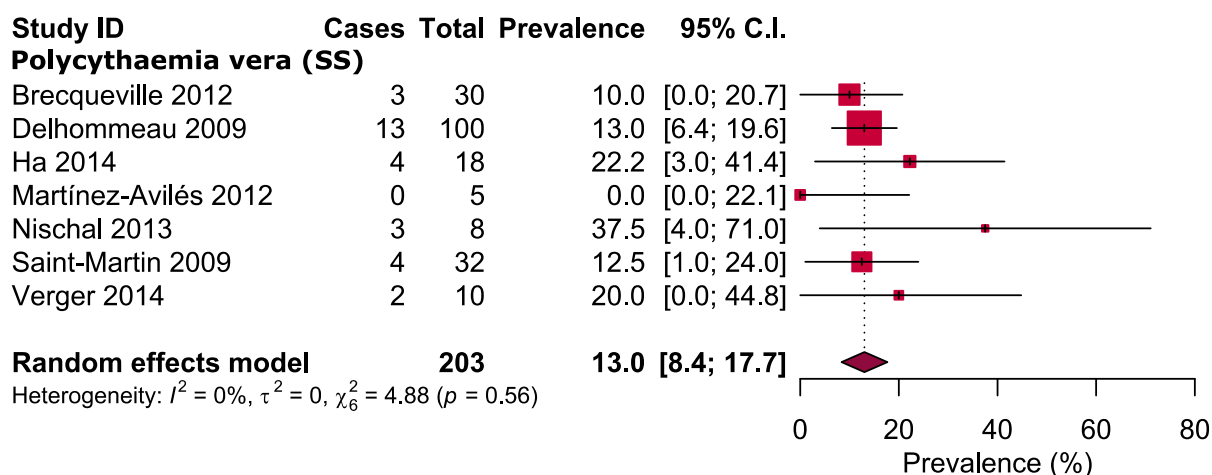

F

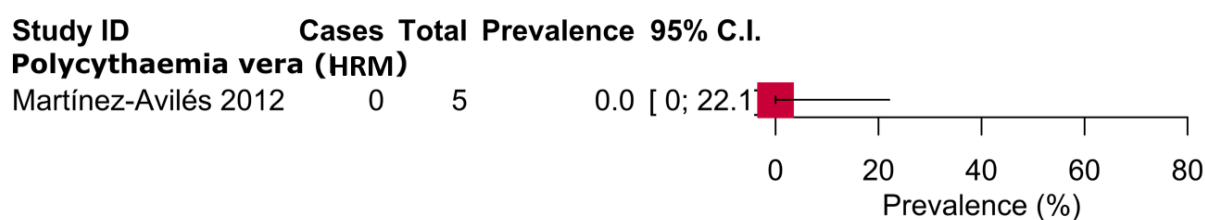

G

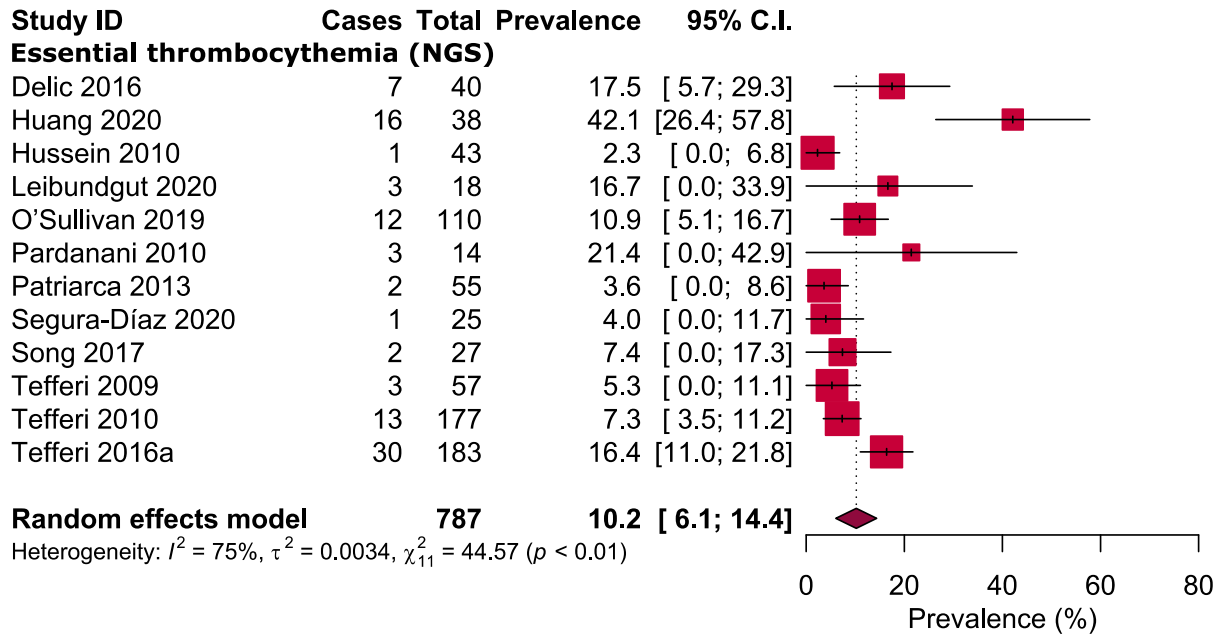

H

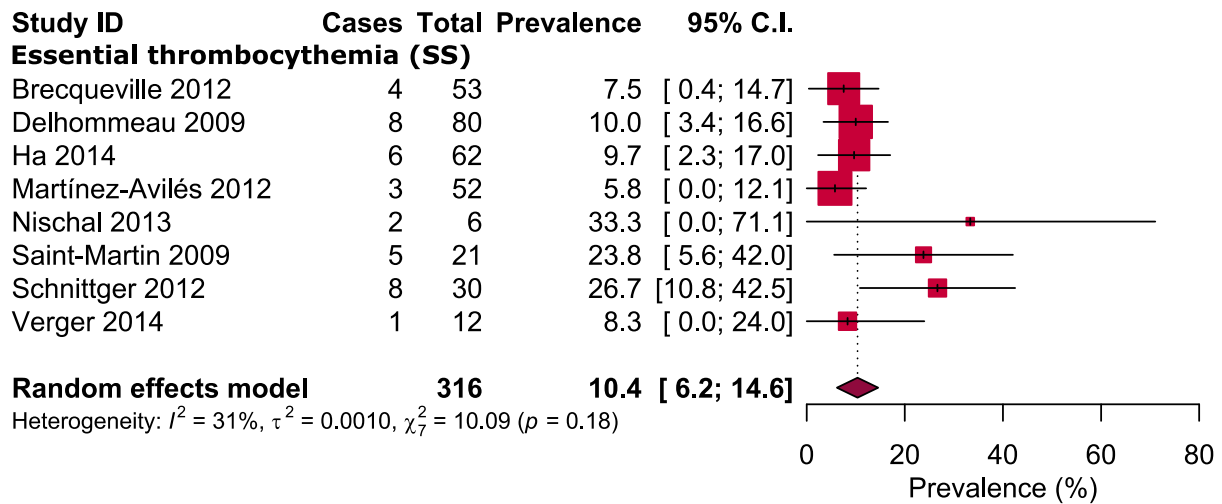

I

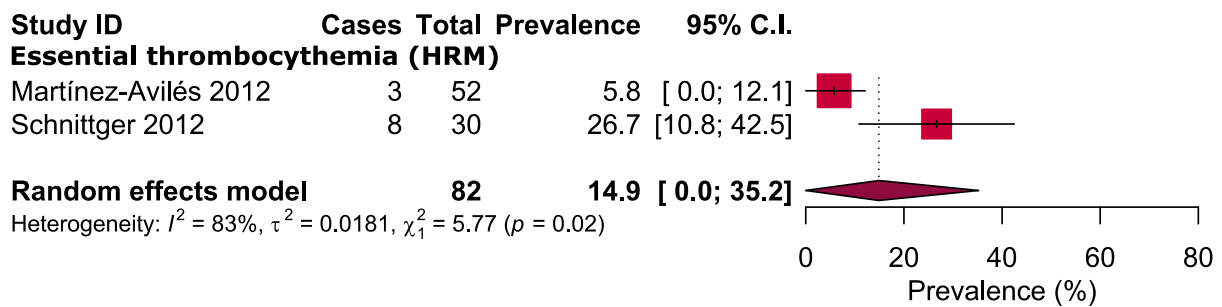

J

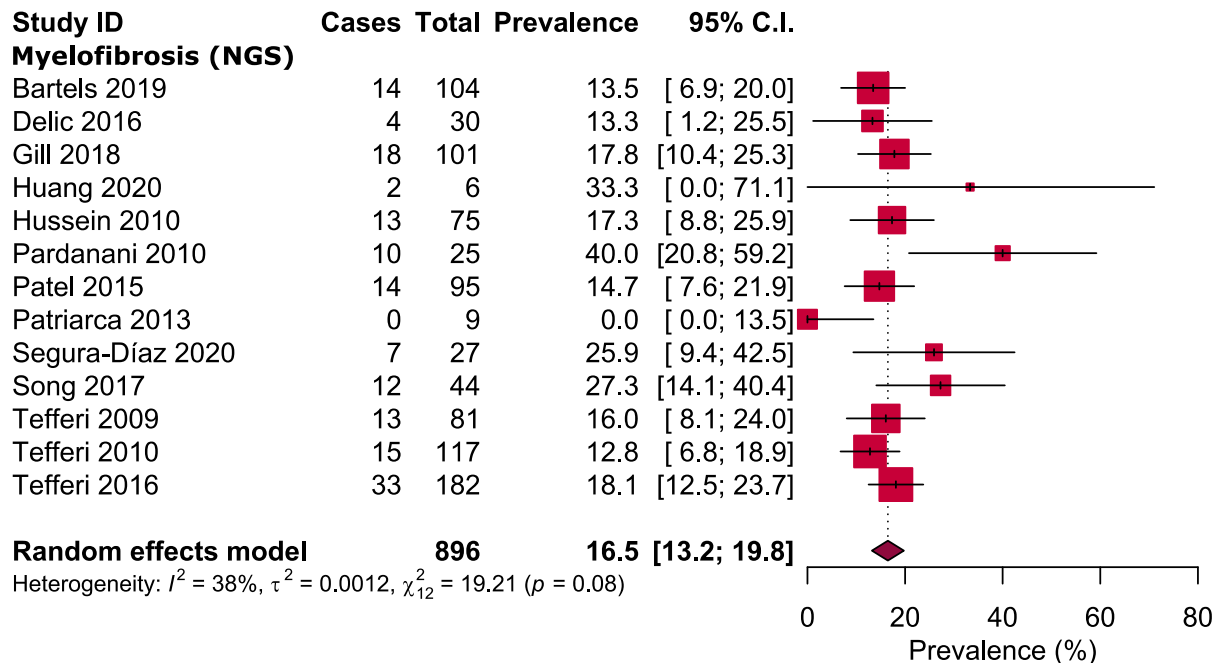

K

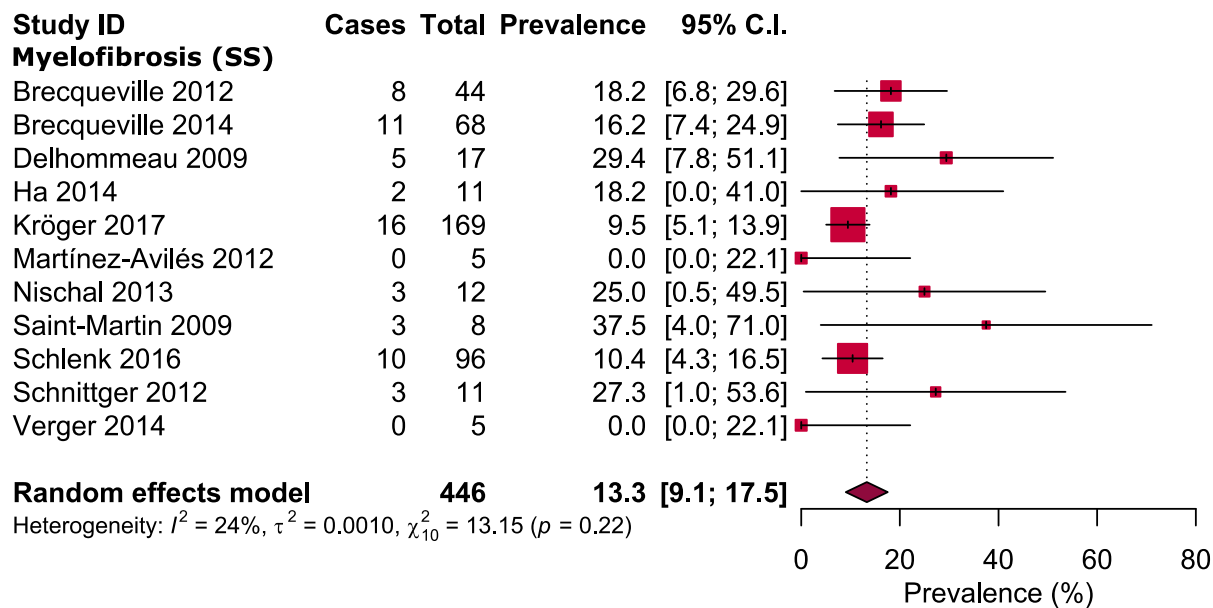

L

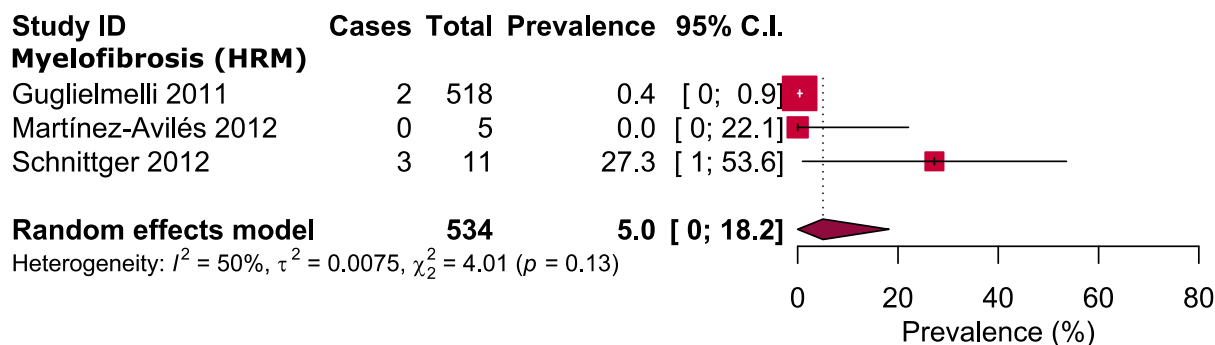

Figure S4. Prevalence of *TET2* gene mutations based on different methods used to detect *TET2* gene mutations in MPN.

A

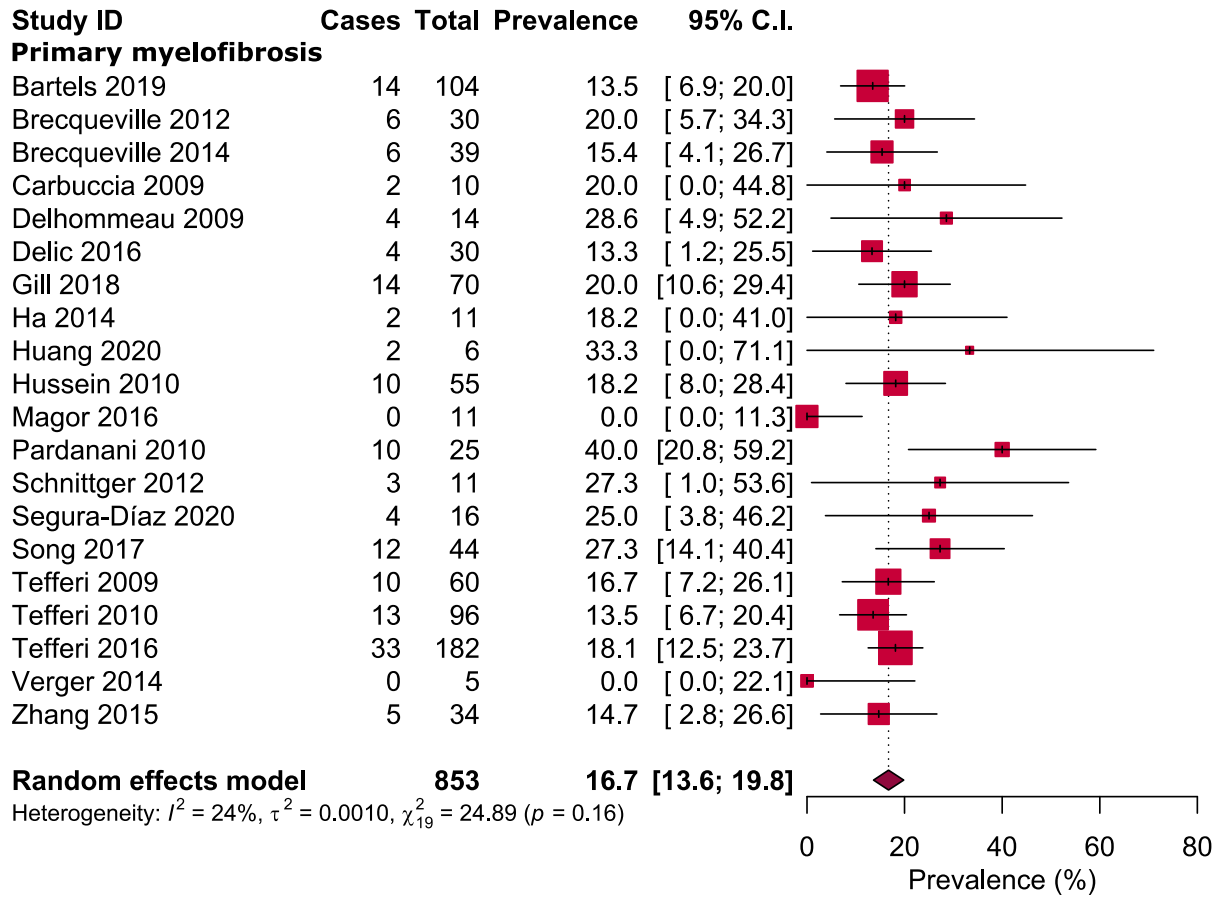

B

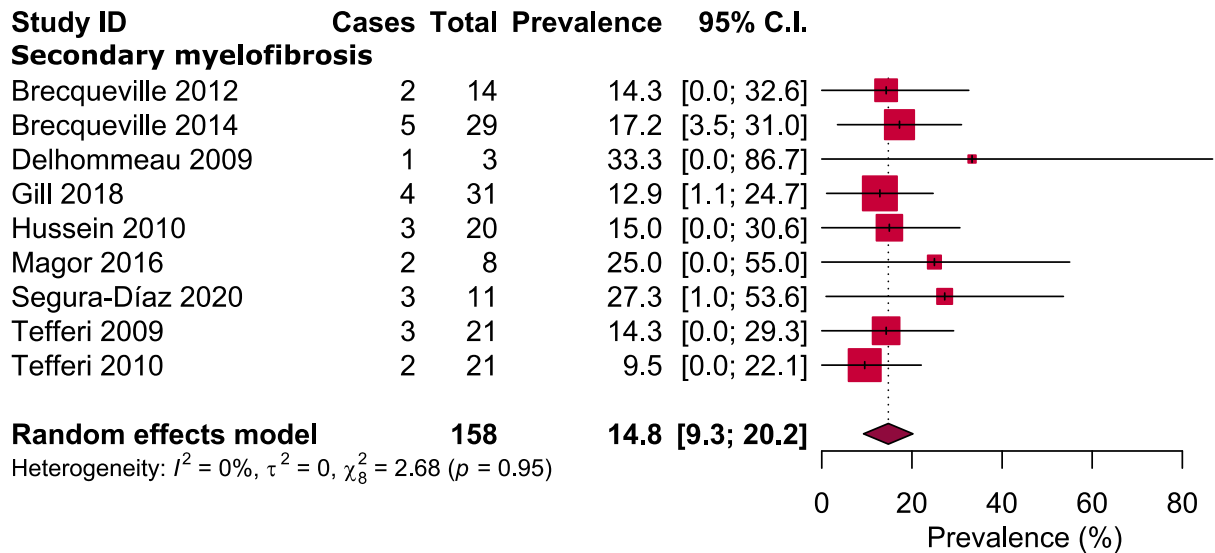

**Figure S5.** Subgroup analysis. Prevalence of *TET2* gene mutations in patients with (A) PMF and (B) SMF.

A

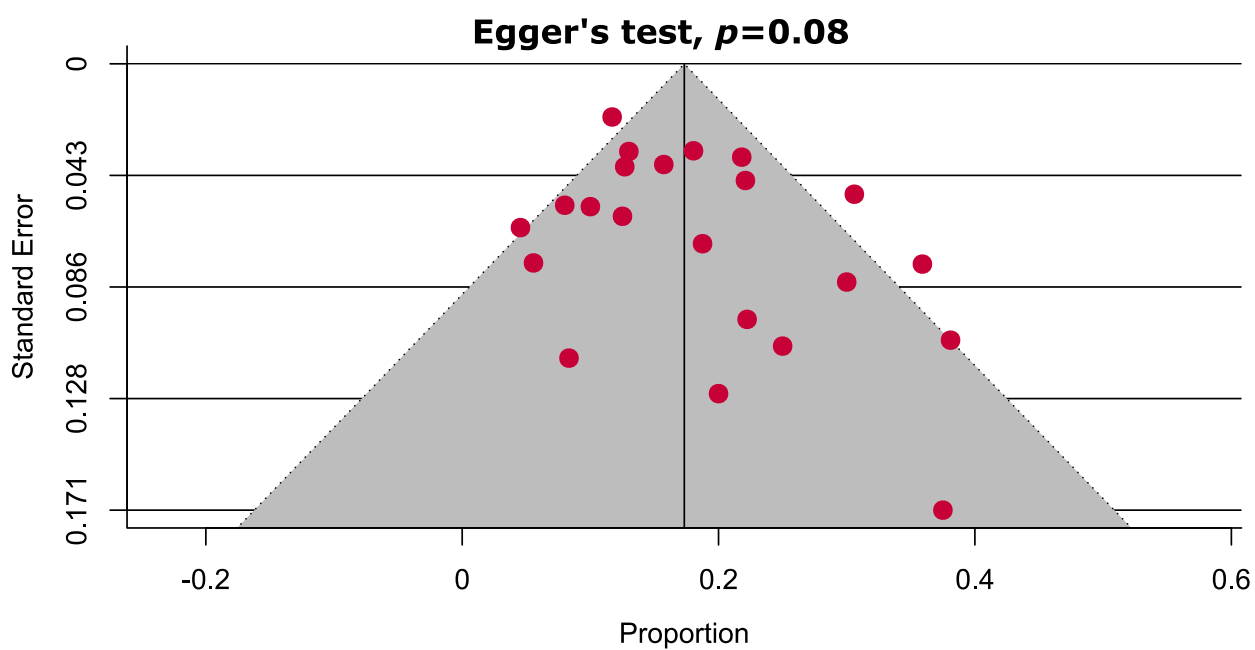

B

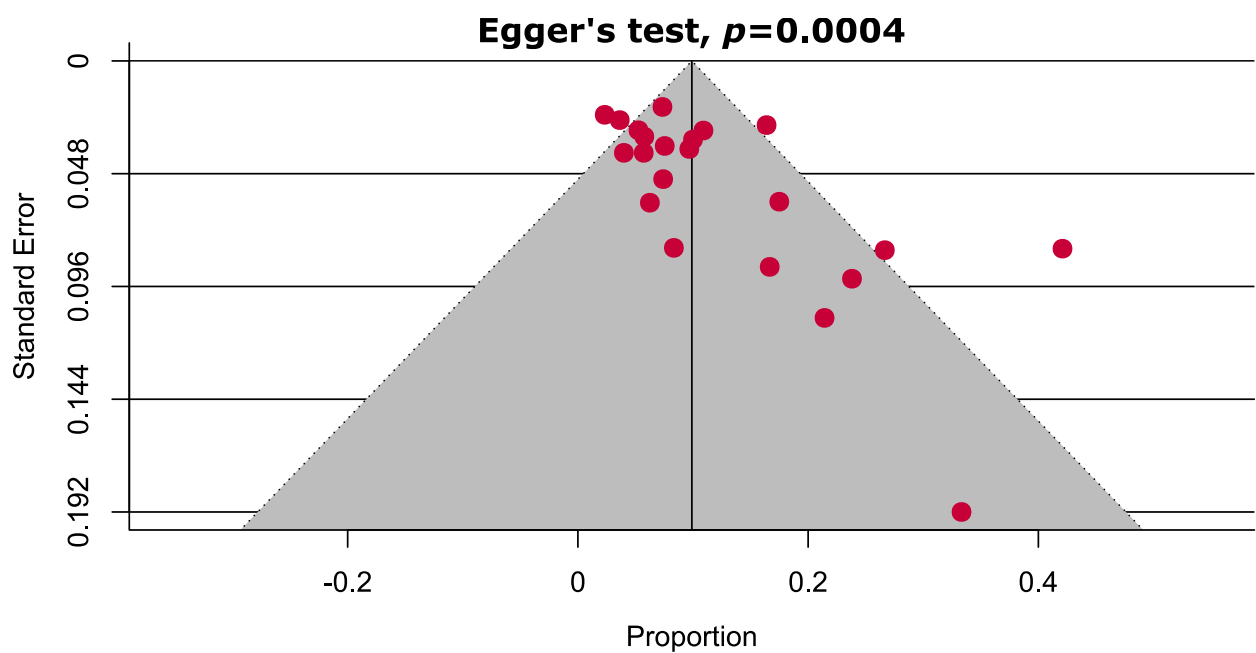

C

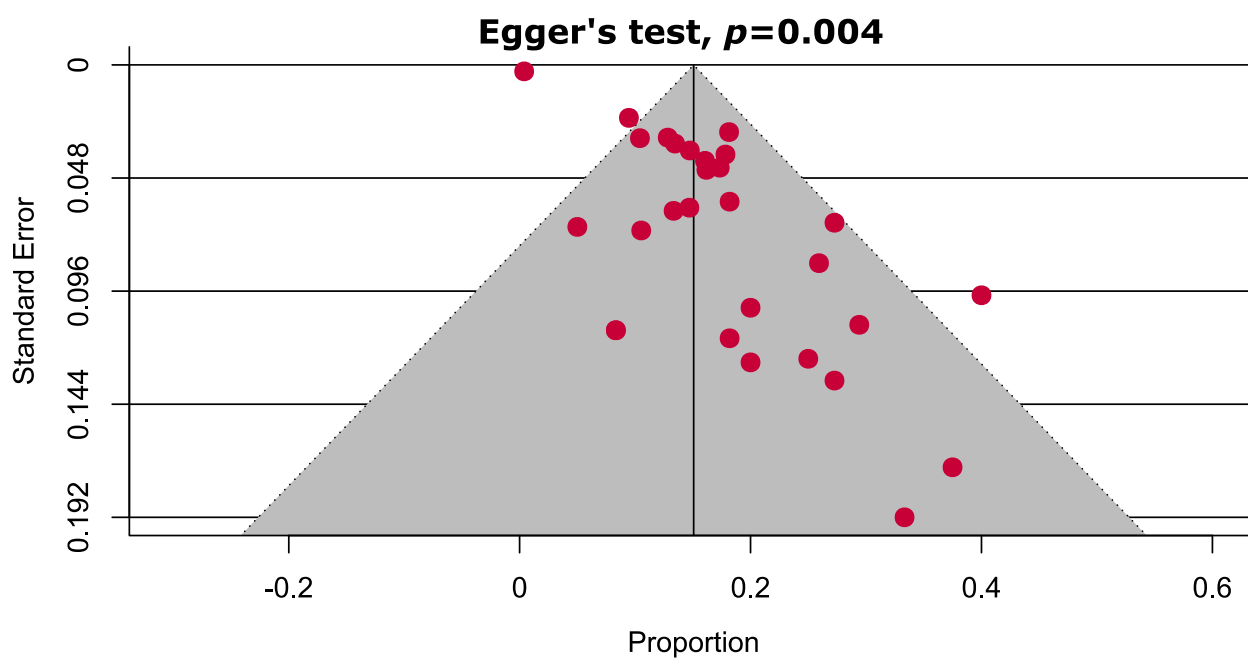

**Figure S6.** Funnel plots estimating the prevalence of *TET2* gene mutations in patients with (A) polycythaemia vera, (B) essential thrombocythaemia and (C) myelofibrosis.



A

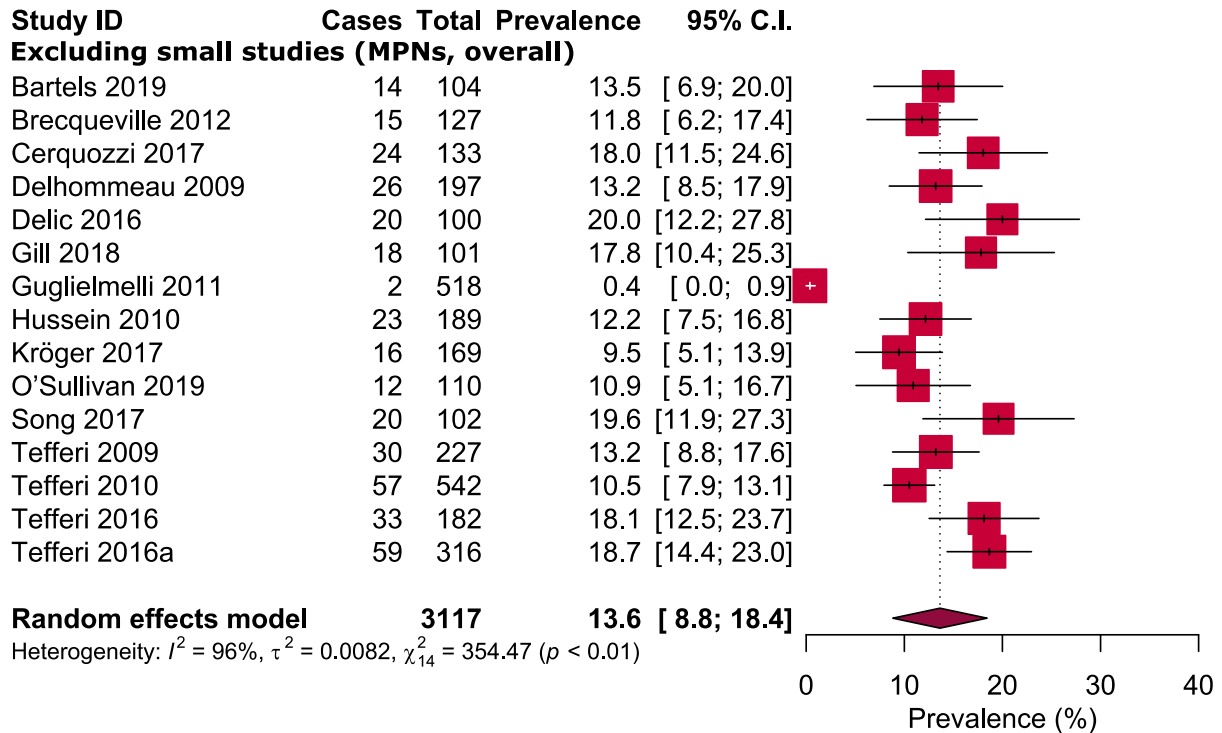

B

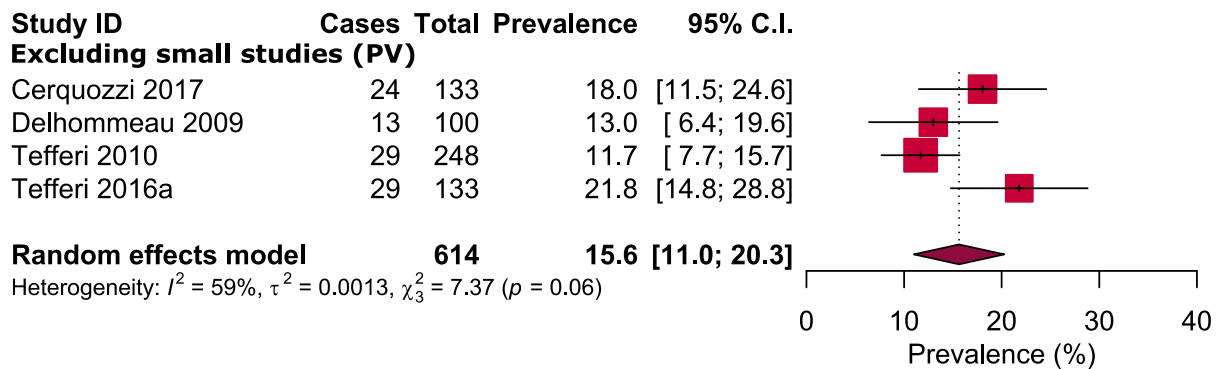

C

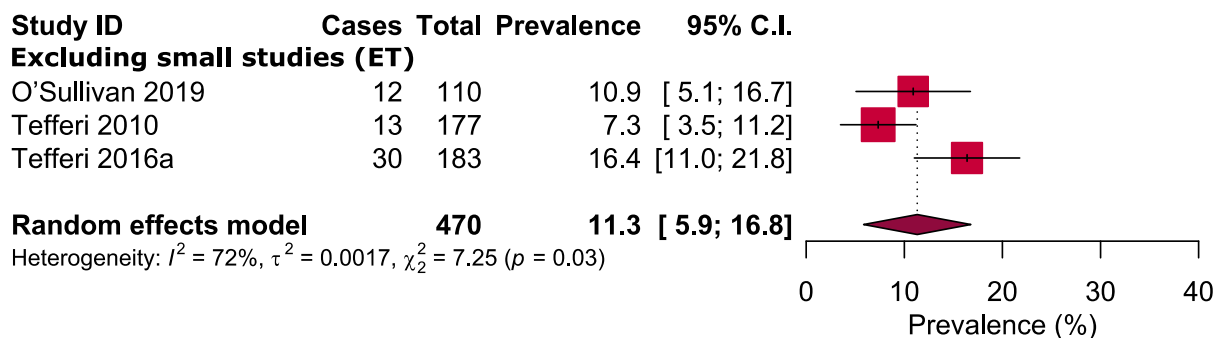

D

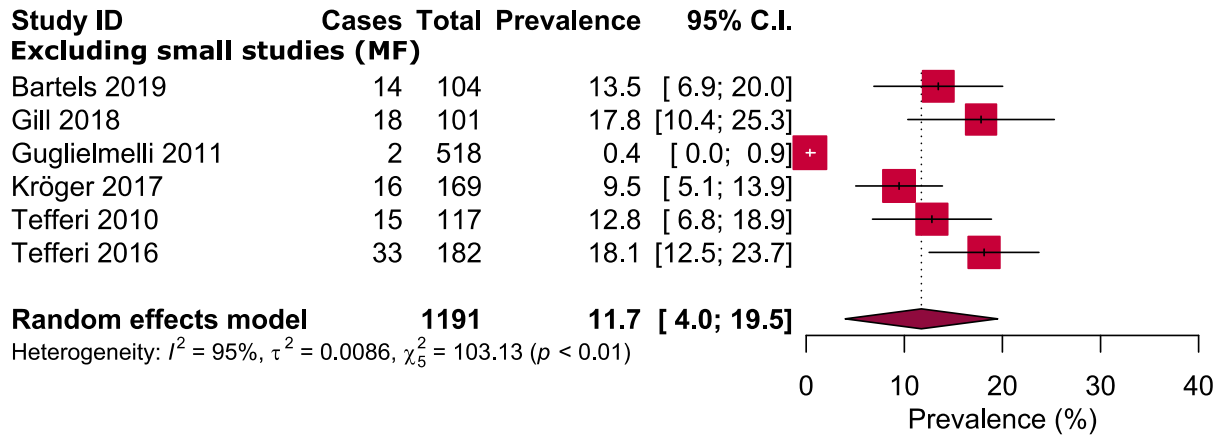

E

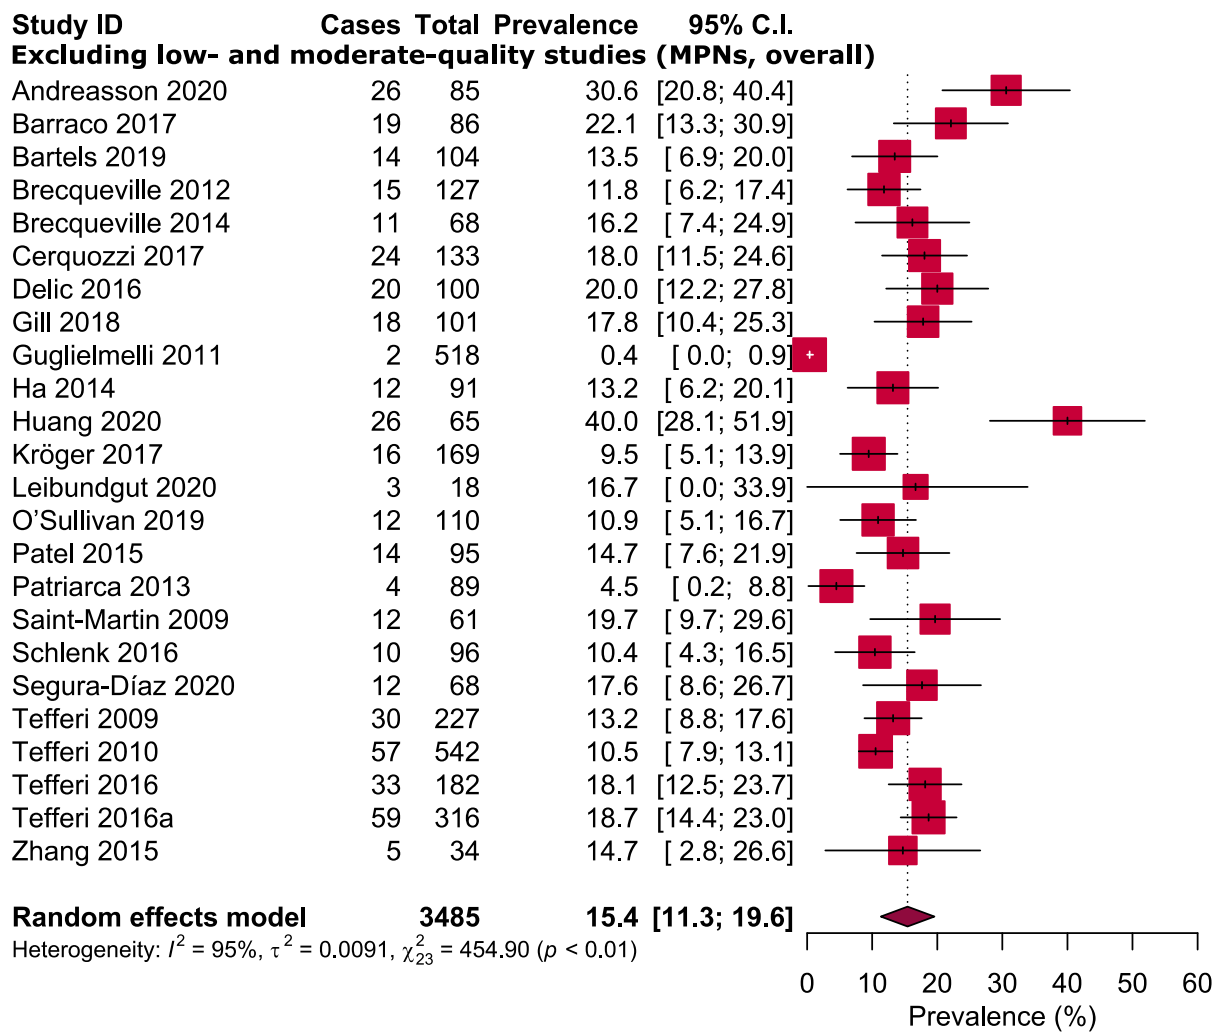

F

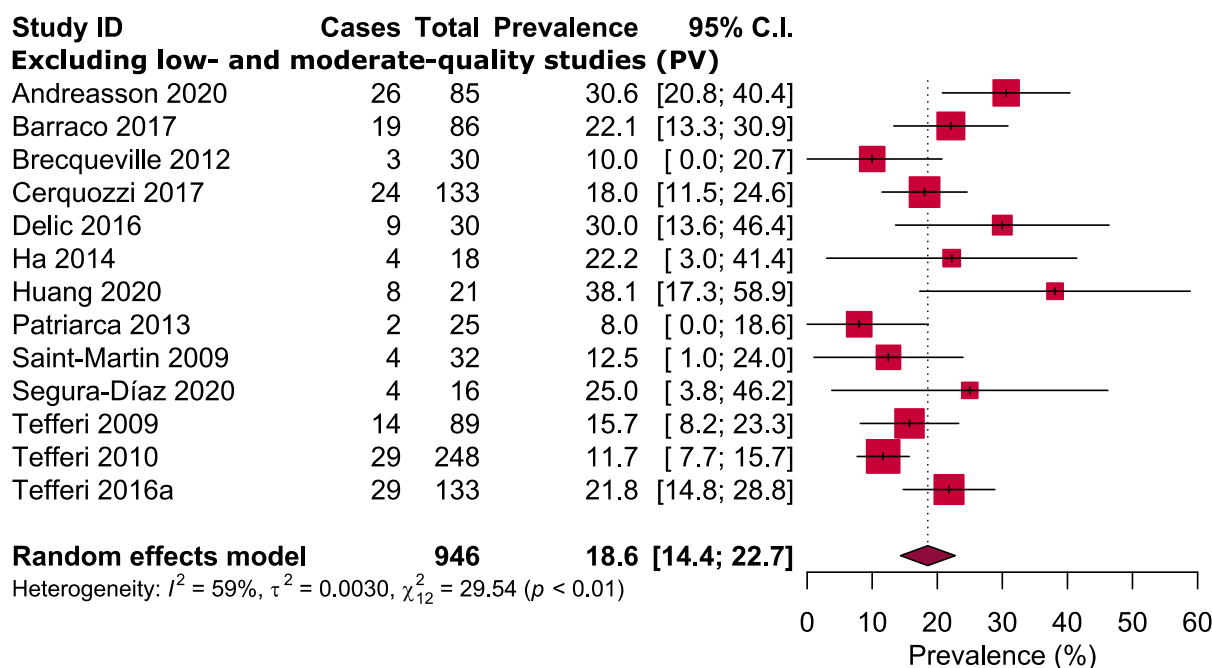

G

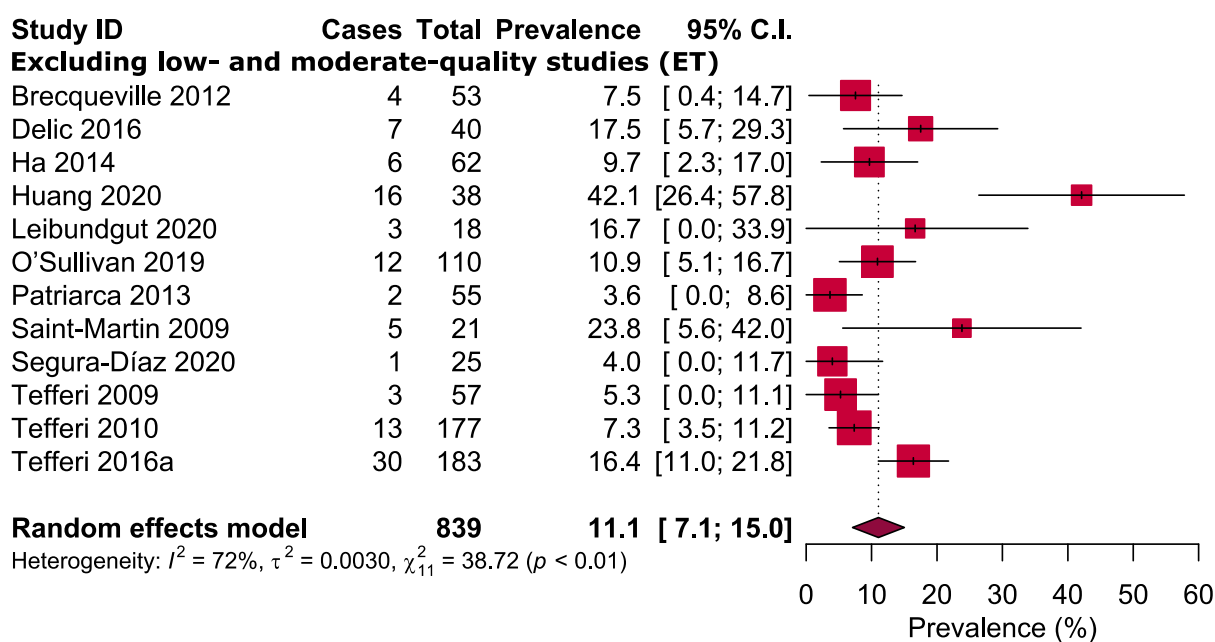

H

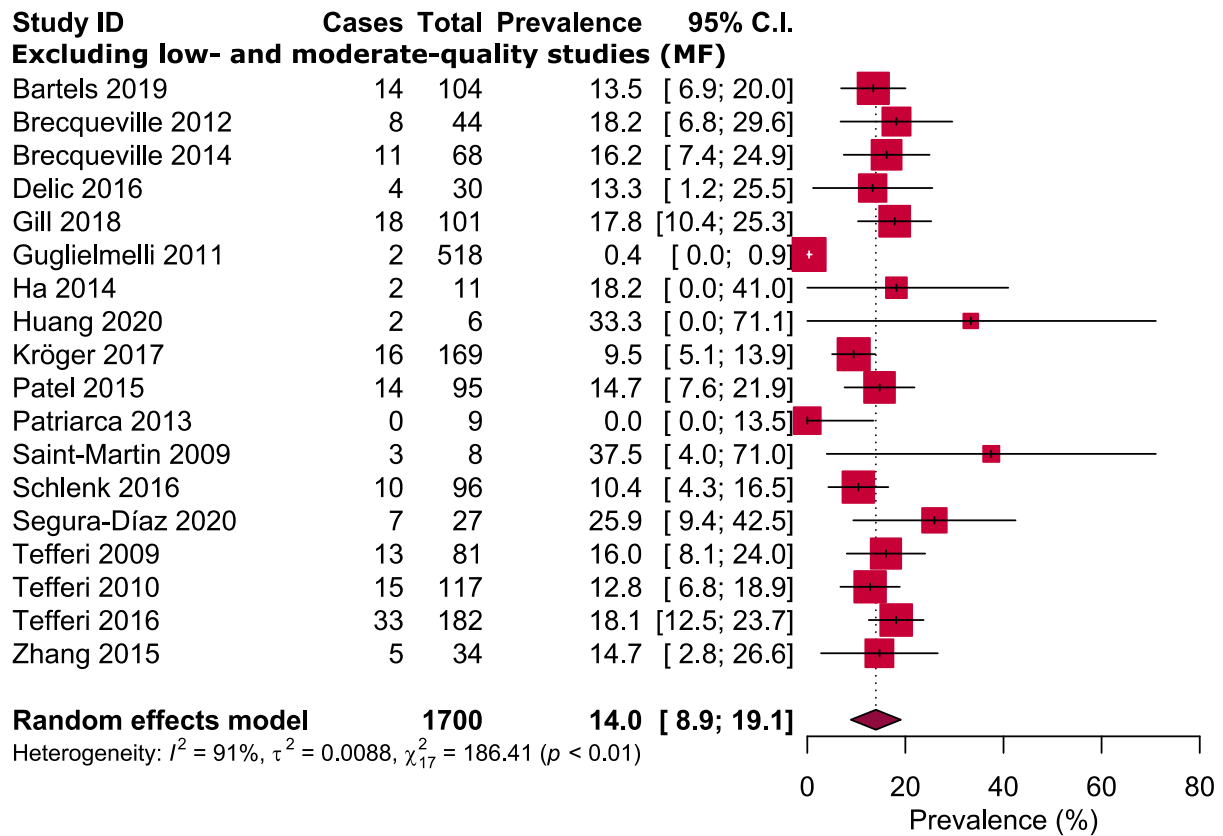

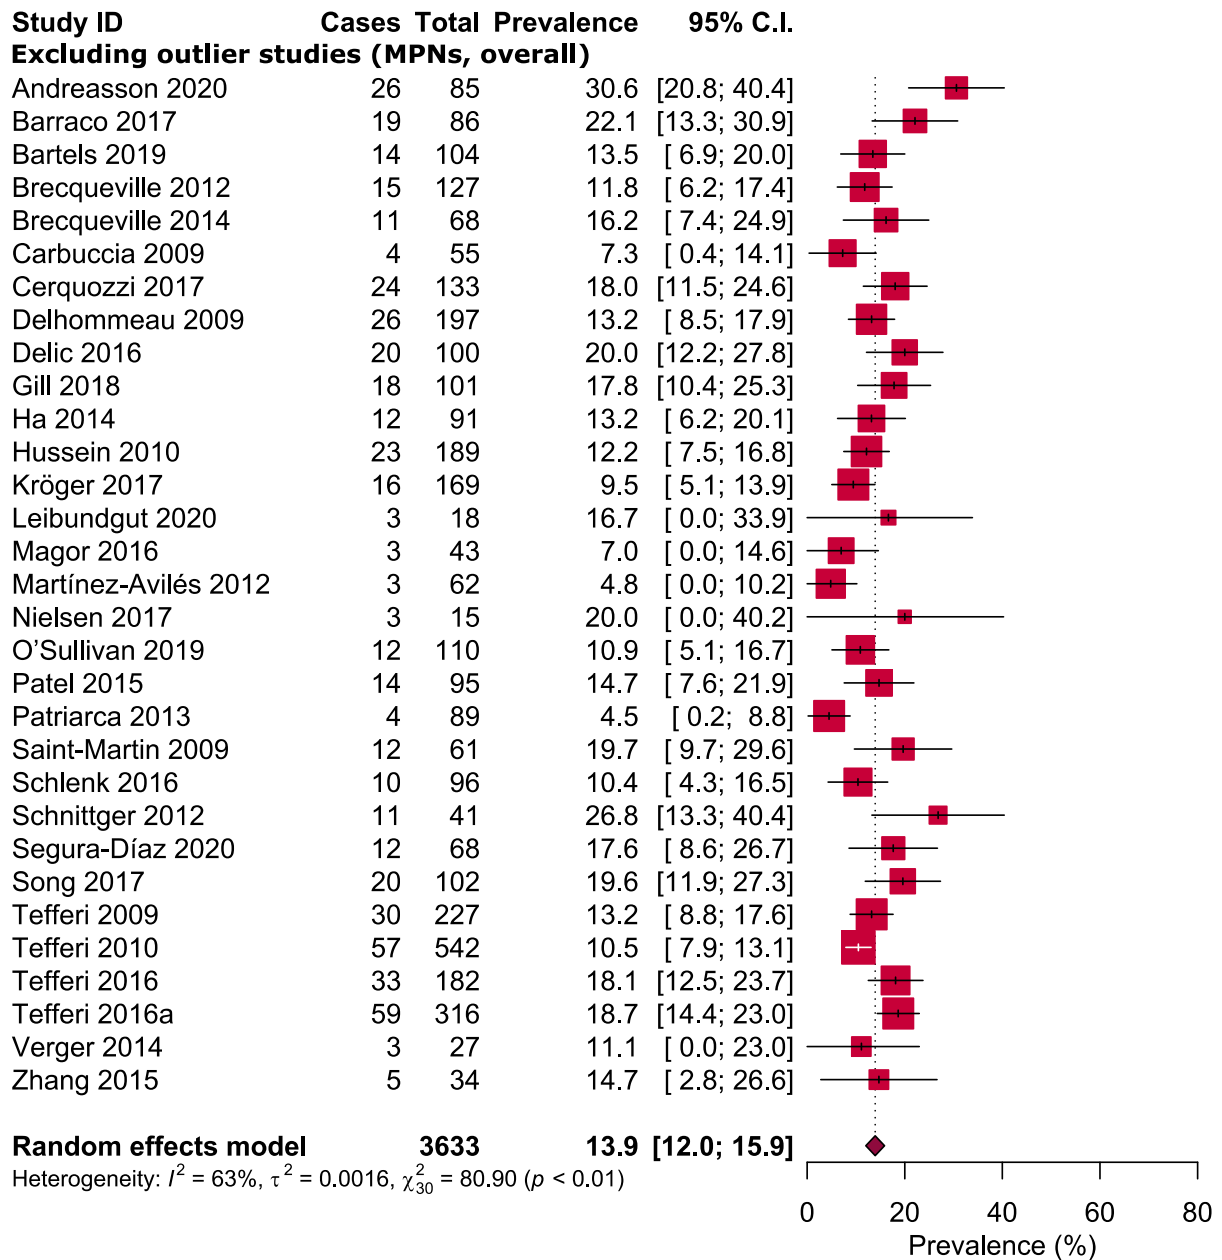

J

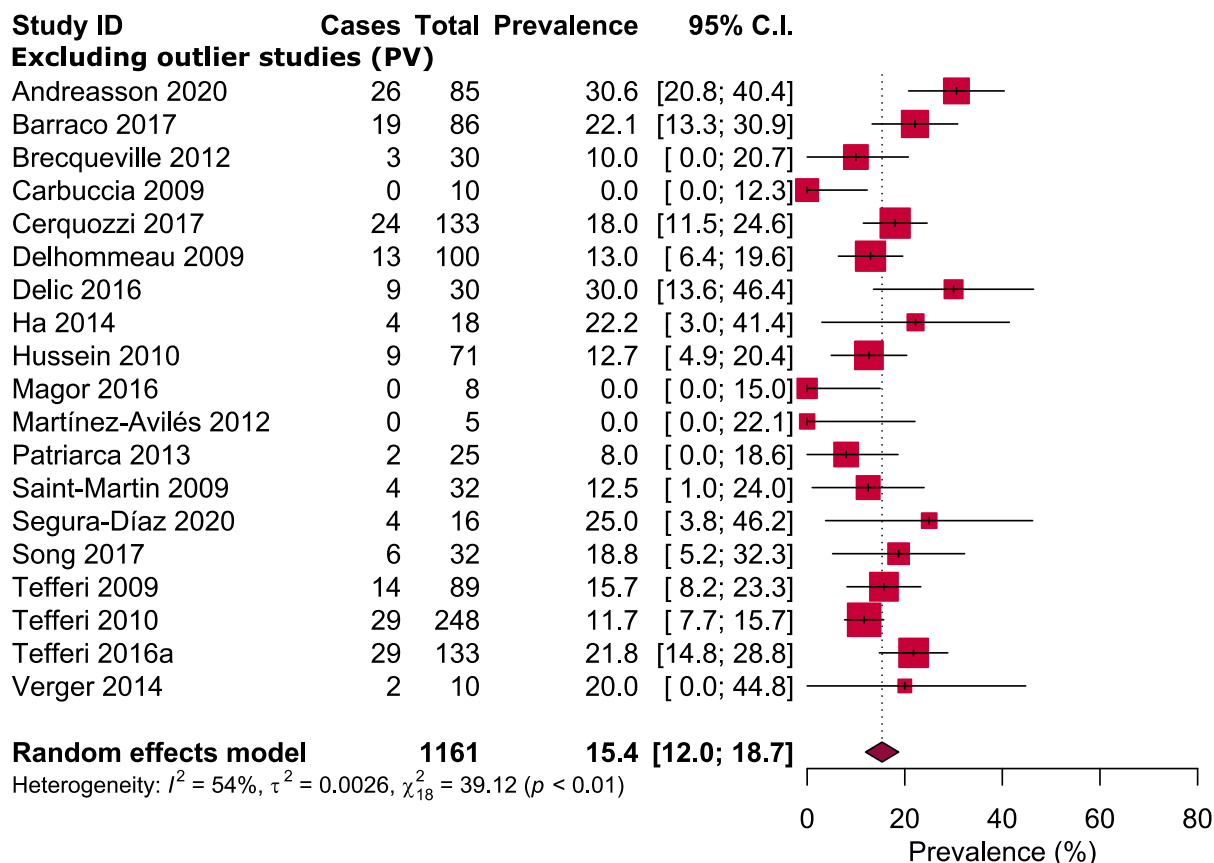

K

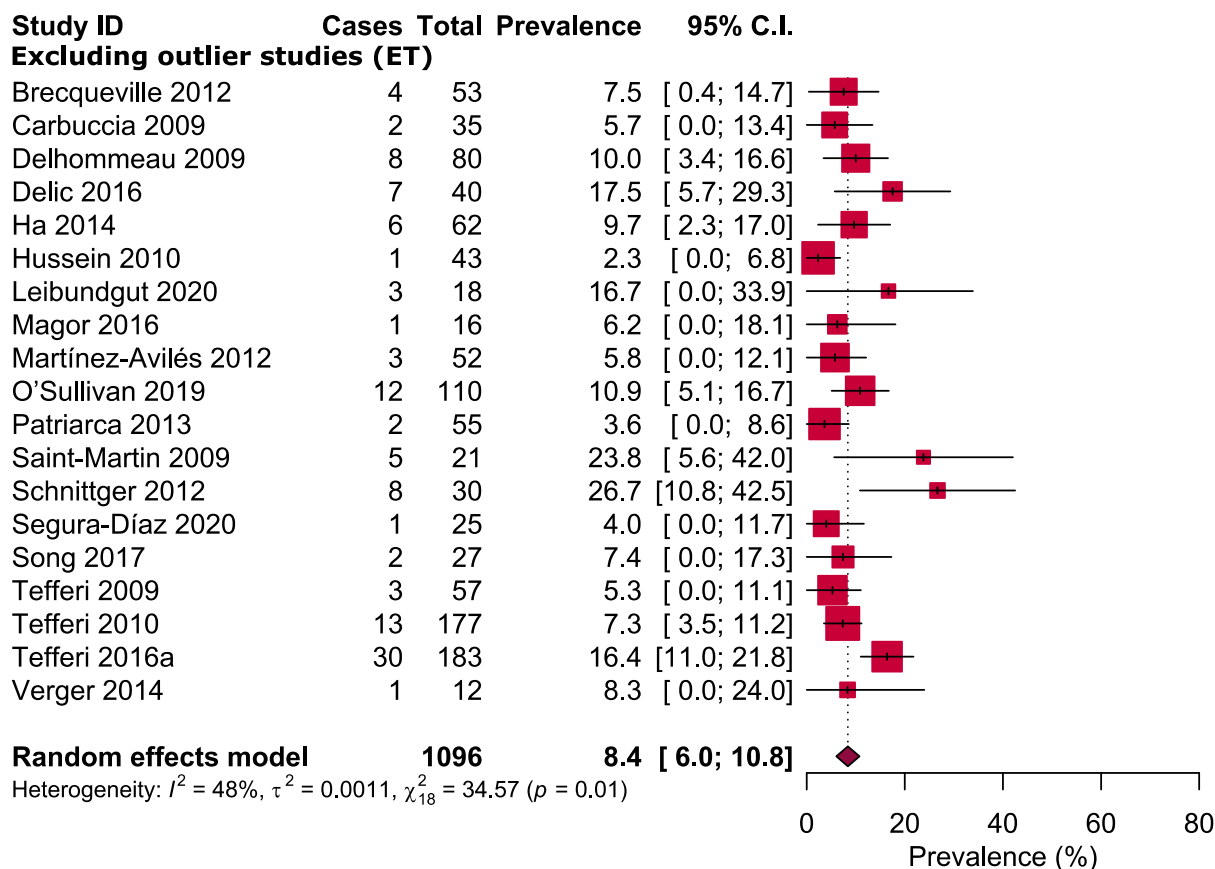

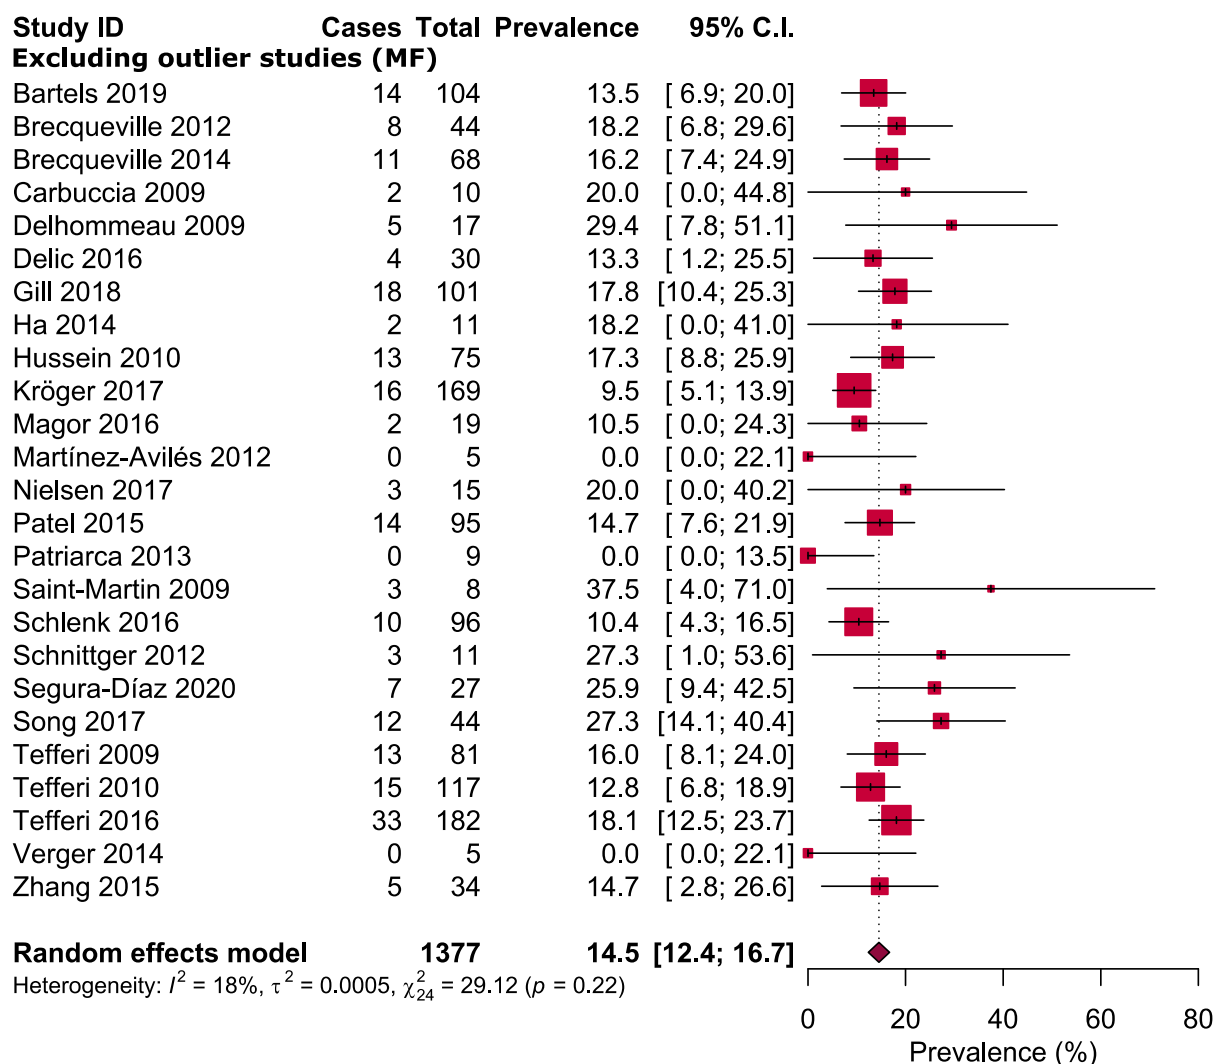

Figure S7. Sensitivity analyses.

## References

- Andréasson, B.; Pettersson, H.; Wasslavik, C.; Johansson, P.; Palmqvist, L.; Asp, J. ASXL1 mutations, previous vascular complications and age at diagnosis predict survival in 85 WHO-defined polycythaemia vera patients. *Br. J. Haematol.* **2020**, *189*, 913–919.
- Barraco, D.; Cerquozzi, S.; Gangat, N.; Patnaik, M.M.; Lasho, T.; Finke, C.; Hanson, C.A.; Ketterling, R.P.; Pardanani, A.; Tefferi, A. Monocytosis in polycythemia vera: Clinical and molecular correlates. *Am. J. Hematol.* **2017**, *92*, 640–645.
- Brecqueville, M.; Rey, J.; Bertucci, F.; Coppin, E.; Finetti, P.; Carbuccia, N.; Cervera, N.; Gelsi-Boyer, V.; Arnoulet, C.; Gisserot, O.; et al. Mutation analysis of ASXL1, CBL, DNMT3A, IDH1, IDH2, JAK2, MPL, NF1, SF3B1, SUZ12, and TET2 in myeloproliferative neoplasms. *Genes Chromosomes Cancer* **2012**, *51*, 743–755.
- Brecqueville, M.; Rey, J.; Devillier, R.; Guille, A.; Gillet, R.; Adélaide, J.; Gelsi-Boyer, V.; Arnoulet, C.; Chaffanet, M.; Mozzone, M.J.; et al. Array comparative genomic hybridization and sequencing of 23 genes in 80 patients with myelofibrosis at chronic or acute phase. *Haematologica* **2014**, *99*, 37–45.
- Carbuccia, N.; Murati, A.; Trouplin, V.; Brecqueville, M.; Adelaide, J.; Rey, J.; Vainchenker, W.; Bernard, O.; Chaffanet, M.; Vey, N. Mutations of ASXL1 gene in myeloproliferative neoplasms. *Leukemia* **2009**, *23*, 2183–2186.
- Cerquozzi, S.; Barraco, D.; Lasho, T.; Finke, C.; Hanson, C.A.; Ketterling, R.P.; Pardanani, A.; Gangat, N.; Tefferi, A. Risk factors for arterial versus venous thrombosis in polycythemia vera: A single center experience in 587 patients. *Blood Cancer J.* **2017**, *7*, 662.
- Delhommeau, F.; Dupont, S.; Della Valle, V.; James, C.; Trannoy, S.; Massé, A.; Kosmider, O.; Le Couedic, J.P.; Robert, F.; Alberdi, A.; et al. Mutation in TET2 in myeloid cancers. *N. Engl. J. Med.* **2009**, *360*, 2289–2301.
- Delic, S.; Rose, D.; Kern, W.; Nadarajah, N.; Haferlach, C.; Haferlach, T.; Meggendorfer, M. Application of an NGS-based 28-gene panel in myeloproliferative neoplasms reveals distinct mutation patterns in essential thrombocythaemia, primary myelofibrosis and polycythaemia vera. *Br. J. Haematol.* **2016**, *175*, 419–426.

9. Gill, H.; Ip, H.W.; Yim, R.; Tang, W.F.; Pang, H.H.; Lee, P.; Leung, G.M.K.; Li, J.; Tang, K.; So, J.C.C.; et al. Next-generation sequencing with a 54-gene panel identified unique mutational profile and prognostic markers in Chinese patients with myelofibrosis. *Ann. Hematol.* **2019**, *98*, 869–879.
10. Guglielmelli, P.; Biamonte, F.; Score, J.; Hidalgo-Curtis, C.; Cervantes, F.; Maffioli, M.; Fanelli, T.; Ernst, T.; Winkelman, N.; Jones, A.V.; et al. EZH2 mutational status predicts poor survival in myelofibrosis. *Blood* **2011**, *118*, 5227–5234.
11. Ha, J.S.; Jeon, D.S.; Kim, J.R.; Ryoo, N.H.; Suh, J.S. Analysis of the ten-eleven translocation 2 (TET2) gene mutation in myeloproliferative neoplasms. *Ann. Clin. Lab. Sci.* **2014**, *44*, 173–179.
12. Huang, X.; Wu, J.; Deng, X.; Xu, X.; Zhang, X.; Ma, W.; Hu, T.; Yang, J.; Guan, M.; Tang, G. Mutation profiles of classic myeloproliferative neoplasms detected by a customized next-generation sequencing-based 50-gene panel. *J. Bio-X Res.* **2020**, *3*, 13–20.
13. Hussein, K.; Abdel-Wahab, O.; Lasho, T.L.; Van Dyke, D.L.; Levine, R.L.; Hanson, C.A.; Pardanani, A.; Tefferi, A. Cytogenetic correlates of TET2 mutations in 199 patients with myeloproliferative neoplasms. *Am. J. Hematol.* **2010**, *85*, 81.
14. Kröger, N.; Panagiota, V.; Badbaran, A.; Zabelina, T.; Trivai, I.; Araujo Cruz, M.M.; Shahswar, R.; Ayuk, F.; Gehlhaar, M.; Wolschke, C.; et al. Impact of Molecular Genetics on Outcome in Myelofibrosis Patients after Allogeneic Stem Cell Transplantation. *Biol. Blood Marrow Transplant.* **2017**, *23*, 1095–1101.
15. Oppliger Leibundgut, E.; Haubitz, M.; Burington, B.; Ottmann, O.G.; Spitzer, G.; Odenike, O.; McDevitt, M.A.; Röth, A.; Snyder, D.S.; Baerlocher, G.M. Dynamics of mutations in patients with essential thrombocythemia treated with imetelstat. *Haematologica* **2020**, doi:10.3324/haematol.2020.252817.
16. Magor, G.W.; Tallack, M.R.; Klose, N.M.; Taylor, D.; Korbie, D.; Mollee, P.; Trau, M.; Perkins, A.C. Rapid Molecular Profiling of Myeloproliferative Neoplasms Using Targeted Exon Resequencing of 86 Genes Involved in JAK-STAT Signaling and Epigenetic Regulation. *J. Mol. Diagn.* **2016**, *18*, 707–718.
17. Martinez-Aviles, L.; Besses, C.; Alvarez-Larran, A.; Torres, E.; Serrano, S.; Bellosillo, B. TET2, ASXL1, IDH1, IDH2, and c-CBL genes in JAK2-and MPL-negative myeloproliferative neoplasms. *Ann. Hematol.* **2012**, *91*, 533–541.
18. Nischal, S.; Bhattacharyya, S.; Christopheit, M.; Yu, Y.; Zhou, L.; Bhagat, T.D.; Sohal, D.; Will, B.; Mo, Y.; Suzuki, M.; et al. Methyloome profiling reveals distinct alterations in phenotypic and mutational subgroups of myeloproliferative neoplasms. *Cancer Res.* **2013**, *73*, 1076–1085.
19. O'Sullivan, J.M.; Hamblin, A.; Yap, C.; Fox, S.; Boucher, R.; Panchal, A.; Alimam, S.; Dreau, H.; Howard, K.; Ware, P.; et al. The poor outcome in high molecular risk, hydroxycarbamide-resistant/intolerant ET is not ameliorated by ruxolitinib. *Blood* **2019**, *134*, 2107–2111.
20. Pardanani, A.; Lasho, T.; Finke, C.; Oh, S.T.; Gotlib, J.; Tefferi, A. LNK mutation studies in blast-phase myeloproliferative neoplasms, and in chronic-phase disease with TET2, IDH, JAK2 or MPL mutations. *Leukemia* **2010**, *24*, 1713–1718.
21. Patel, K.P.; Newberry, K.J.; Luthra, R.; Jabbour, E.; Pierce, S.; Cortes, J.; Singh, R.; Mehrotra, M.; Routbort, M.J.; Luthra, M.; et al. Correlation of mutation profile and response in patients with myelofibrosis treated with ruxolitinib. *Blood* **2015**, *126*, 790–797.
22. Patriarca, A.; Colaizzo, D.; Tiscia, G.; Spadano, R.; Di Zaccaro, S.; Spadano, A.; Villanova, I.; Margaglione, M.; Grandone, E.; Dragani, A. TET2 mutations in Ph-negative myeloproliferative neoplasms: Identification of three novel mutations and relationship with clinical and laboratory findings. *BioMed Res. Int.* **2013**, *2013*, 929840.
23. Saint-Martin, C.; Leroy, G.; Delhommeau, F.; Panelatti, G.; Dupont, S.; James, C.; Plo, I.; Bordessoule, D.; Chomienne, C.; Delannoy, A.; et al. Analysis of the Ten-Eleven Translocation 2 (TET2) gene in familial myeloproliferative neoplasms. *Blood* **2009**, *114*, 1628–1632.
24. Schlenk, R.F.; Stegelmann, F.; Reiter, A.; Jost, E.; Gattermann, N.; Hebart, H.; Waller, C.; Hochhaus, A.; Platzbecker, U.; Schafhausen, P.; et al. Pomalidomide in myeloproliferative neoplasm-associated myelofibrosis. *Leukemia* **2017**, *31*, 889–895.
25. Schnittger, S.; Bacher, U.; Eder, C.; Dicker, F.; Alpermann, T.; Grossmann, V.; Kohlmann, A.; Kern, W.; Haferlach, C.; Haferlach, T. Molecular analyses of 15,542 patients with suspected BCR-ABL1-negative myeloproliferative disorders allow to develop a stepwise diagnostic workflow. *Haematologica* **2012**, *97*, 1582–1585.
26. Segura-Díaz, A.; Stuckey, R.; Florido, Y.; González-Martín, J.M.; López-Rodríguez, J.F.; Sánchez-Sosa, S.; González-Pérez, E.; Perdomo, M.N.S.; del Mar Perera, M.; de la Iglesia, S.; et al. Thrombotic risk detection in patients with polycythemia vera: The predictive role of DNMT3A/TET2/ASXL1 mutations. *Cancers* **2020**, *12*, 934.
27. Song, J.; Hussaini, M.; Zhang, H.; Shao, H.; Qin, D.; Zhang, X.; Ma, Z.; Hussaini Naqvi, S.M.; Zhang, L.; Moscinski, L.C. Comparison of the Mutational Profiles of Primary Myelofibrosis, Polycythemia Vera, and Essential Thrombocythosis. *Am. J. Clin. Pathol.* **2017**, *147*, 444–452.
28. Tefferi, A.; Pardanani, A.; Lim, K.H.; Abdel-Wahab, O.; Lasho, T.L.; Patel, J.; Gangat, N.; Finke, C.M.; Schwager, S.; Mullally, A.; et al. TET2 mutations and their clinical correlates in polycythemia vera, essential thrombocythemia and myelofibrosis. *Leukemia* **2009**, *23*, 905–911.
29. Tefferi, A.; Lasho, T.L.; Abdel-Wahab, O.; Guglielmelli, P.; Patel, J.; Caramazza, D.; Pieri, L.; Finke, C.M.; Kilpivaara, O.; Wadleigh, M.; et al. IDH1 and IDH2 mutation studies in 1473 patients with chronic-, fibrotic- or blast-phase essential thrombocythemia, polycythemia vera or myelofibrosis. *Leukemia* **2010**, *24*, 1302–1309.
30. Tefferi, A.; Lasho, T.L.; Finke, C.M.; Elala, Y.; Hanson, C.A.; Ketterling, R.P.; Gangat, N.; Pardanani, A. Targeted deep sequencing in primary myelofibrosis. *Blood Adv.* **2016**, *1*, 105–111.
31. Tefferi, A.; Lasho, T.L.; Guglielmelli, P.; Finke, C.M.; Rotunno, G.; Elala, Y.; Pacilli, A.; Hanson, C.A.; Pancrazzi, A.; Ketterling, R.P.; et al. Targeted deep sequencing in polycythemia vera and essential thrombocythemia. *Blood Adv.* **2016**, *1*, 21–30.



32. Verger, E.; Andreoli, A.; Chomienne, C.; Kiladjian, J.J.; Cassinat, B. TET2 gene sequencing may be helpful for myeloproliferative neoplasm diagnosis. *Br. J. Haematol.* **2014**, *165*, 416–419.
33. Chunxia, Z.; Li, G.; Qianqian, J.; Zhenling, L.; Fanzhou, H.; Yayue, G.; Ming, G.; Shaohua, X.; Yin, T.; Yanrong, C.; et al. Symptom burden and its relationships with risk assessment and gene mutations in patients with primary myelofibrosis. *J. Leuk. Lymphoma* **2015**, *24*, 453–456.
34. Bartels, S.; Faisal, M.; Büsche, G.; Schlue, J.; Hasemeier, B.; Schipper, E.; Vogtmann, J.; Westphal, L.; Lehmann, U.; Kreipe, H. Mutations associated with age-related clonal hematopoiesis in PMF patients with rapid progression to myelofibrosis. *Leukemia* **2019**, *34*, 1364–1372.
35. Myrtue Nielsen, H.; Lykkegaard Andersen, C.; Westman, M.; Sommer Kristensen, L.; Asmar, F.; Arvid Kruse, T.; Thomasen, M.; Stauffer Larsen, T.; Skov, V.; Lotte Hansen, L.; et al. Epigenetic changes in myelofibrosis: Distinct methylation changes in the myeloid compartments and in cases with ASXL1 mutations. *Sci. Rep.* **2017**, *7*, 6774.
